# 1 SARS-CoV-2 causes severe alveolar inflammation and barrier 2 dysfunction

3  
4 **Stefanie Deinhardt-Emmer<sup>1,2\*</sup>, Sarah Böttcher<sup>2</sup>, Clio Häring<sup>2</sup>, Liane Giebeler<sup>2</sup>, Andreas Henke<sup>2</sup>,  
5 Roland Zell<sup>2</sup>, Franziska Hornung<sup>1</sup>, Christian Brandt<sup>3</sup>, Mike Marquet<sup>3</sup>, Alexander S. Mosig<sup>4</sup>,  
6 Mathias W. Pletz<sup>3</sup>, Michael Schacke<sup>2</sup>, Jürgen Rödel<sup>1</sup>, Regine Heller<sup>5</sup>, Sandor Nietzsche<sup>6</sup>, Bettina  
7 Löffler<sup>1</sup>, Christina Ehrhardt<sup>2\*</sup>**

8  
9  
10 1 Institute of Medical Microbiology, Jena University Hospital, Am Klinikum 1, D-07747 Jena, Germany  
11 2 Section of Experimental Virology, Institute of Medical Microbiology, Jena University Hospital, Hans-  
12 Knoell-Str. 2, D-07745, Jena, Germany  
13 3 Institute for Infectious Diseases and Infection Control, Jena University Hospital, Jena, 07747, Germany  
14 4 Institute of Biochemistry, Jena University Hospital, Am Klinikum 1, D-07743 Jena, Germany  
15 5 Institute of Molecular Cell Biology, Center for Molecular Biomedicine (CMB), Jena University Hospital,  
16 Hans-Knoell-Str. 2, D-07745, Jena, Germany  
17 6 Center for Electron Microscopy, Jena University Hospital, Ziegelmuehlenweg 1, D-07743 Jena, Germany  
18

19

20 \* Correspondence: **Dr. Stefanie Deinhardt-Emmer**  
21 Institute of Medical Microbiology,  
22 Jena University Hospital,  
23 Am Klinikum 1,  
24 D-07747 Jena, Germany

25  
26 Email: [stefanie.deinhardt-emmer@med.uni-jena.de](mailto:stefanie.deinhardt-emmer@med.uni-jena.de)  
27 Phone: 0151 58373822  
28 ORCID: 0000-0003-4495-4052  
29

30  
31 **Prof. Dr. Christina Ehrhardt**  
32 Section of Experimental Virology  
33 Institute of Medical Microbiology  
34 Jena University Hospital  
35 Hans-Knoell Str. 2  
36 D-07745 Jena

37 Email: [Christina.Ehrhardt@med.uni-jena.de](mailto:Christina.Ehrhardt@med.uni-jena.de)  
38 Phone: 0049-(0)3641-9395700  
39 ORCID: 0000-0002-8879-6087  
40

41

42 **Short Running Title:** SARS-CoV-2 damage alveolar barrier function

43

44

45

46 **ABSTRACT (172):**

47 Infections with SARS-CoV-2 lead to mild to severe coronavirus disease-19 (COVID-19)  
48 with systemic symptoms. Although the viral infection originates in the respiratory  
49 system, it is unclear how the virus can overcome the alveolar barrier, which is  
50 observed in severe COVID-19 disease courses.

51 To elucidate the viral effects on the barrier integrity and immune reactions, we used  
52 mono-cell culture systems and a complex human alveolus-on-a-chip model composed  
53 of epithelial, endothelial, and mononuclear cells.

54 Our data show that SARS-CoV-2 efficiently infected epithelial cells with high viral  
55 loads and inflammatory response, including the interferon expression. By contrast, the  
56 adjacent endothelial layer was not infected and did neither show productive virus  
57 replication or interferon release. With prolonged infection, both cell types are  
58 damaged, and the barrier function is deteriorated, allowing the viral particles to  
59 overbear.

60 In our study, we demonstrate that although SARS-CoV-2 is dependent on the  
61 epithelium for efficient replication, the neighboring endothelial cells are affected, e.g.,  
62 by the epithelial cytokine release, which results in the damage of the alveolar barrier  
63 function and viral dissemination.

64

65

## 66 INTRODUCTION

67 The novel severe acute respiratory syndrome coronavirus (SARS-CoV-2) is a highly  
68 pathogenic virus causing severe respiratory infections, described as coronavirus  
69 disease-19 (COVID-19) (Bar-On et al., 2020). Patients suffer from various symptoms as  
70 fever, cough, breath shortness, headache, muscle aches, and gastrointestinal  
71 symptoms. Hallmarks of severe COVID-19 courses are pneumonia, pulmonary  
72 edema, acute respiratory distress syndrome (ARDS), and multiple organ failure. In  
73 most patients, the disease has a mild course, but in some cases, e.g., elderly with  
74 comorbidities, the infection can develop into a life-threatening condition. In particular  
75 preexisting lung pathologies and systemic diseases such as diabetes predispose to  
76 severe infection courses described by George et al. (2020).

77 Clinical studies revealed that the virus primarily replicates in the lung, which can  
78 cause severe lung damage up to necrotic destruction of large areas of the lung tissue  
79 (Carsana et al., 2020). In autopsies of deceased COVID-19 patients, it has been  
80 observed that particularly in severe cases viral particles can disseminate throughout  
81 the body (Deinhardt-Emmer et al., 2020b; Wichmann et al., 2020). Additionally,  
82 systemic complications have been reported, such as the massive release of  
83 proinflammatory cytokines and thromboembolic events in various organs (Becker,  
84 2020). Consequently, SARS-CoV-2 is regarded as a pneumotropic virus that infects the  
85 patient via the lung but can also cause a systemic infection that affects different organs  
86 with a high mortality rate.

87 Little is known about the initial infection process in the alveolar lung tissue,  
88 particularly about mechanisms that destroy the lung and mechanisms that allow the  
89 virus to affect different organs in the body. Infection models that closely reflect the  
90 patient's situation are mainly lacking in part due to the challenges to infect mice and  
91 the difficulty of accessing and analyzing infected human alveolar lung cells. Up to  
92 now, SARS-CoV-2 infection models have been mainly performed with human airway  
93 (non-alveolar) cells or non-human cell lines that naturally express the ACE2 viral  
94 receptor, such as the African Green Monkey Vero 76 cell line (Hoffmann et al., 2020).  
95 These cells lack organ- and species-specific characteristics of human lung epithelial  
96 cells. For this purpose, cancerous lung epithelial cells (Calu-3 cells), can at least to some  
97 extent, reflect the response of the lung epithelium to viral infection (Bestle et al., 2020).  
98 In our study, we present a human-specific *in vitro*, alveolus-on-a-chip model  
99 composed of cells of human origin susceptible for a SARS-CoV-2 infection. This model  
100 was only recently developed in our lab (Deinhardt-Emmer et al., 2020a). Within the  
101 present study, it was modified by using SARS-CoV-2 permissive epithelial cells (Calu-  
102 3 cells). The epithelial and vascular (primarily isolated human umbilical vascular  
103 endothelial cells; HUVECs) cells were co-cultured with macrophages (primarily  
104 isolated peripheral blood mononuclear cells; PBMCs) resembling the human alveolus  
105 architecture and function. This composition is not only relevant for the gas exchange  
106 but also for an adequate immune response.

107 We were able to show that SARS-CoV-2 replicates in the epithelial layer while  
108 inducing an acute and robust inflammatory response followed by the destruction of

109 the epithelial layer. Interestingly, in this infection scenario, the endothelial cells were  
110 not invaded by SARS-CoV-2 and did not propagate the virus, but nevertheless the  
111 epithelial/endothelial barrier integrity was disrupted.

112

## 113 RESULTS

114

### 115 Efficient SARS-CoV-2 isolation from patients and propagation in cell-culture

116 To gain fully infectious viral particles for our studies, we collected three respiratory  
117 specimens from qRT-PCR-proven COVID-19 patients and performed SARS-CoV-2  
118 propagation in cell culture systems (Vero-76 cells). By repeated infection of host cells  
119 and viral replication, we were able to isolate high viral titers originating from three  
120 different patients. Within our studies, the SARS-CoV-2 isolates SARS-CoV-  
121 2/hu/Germany/Jena-vi005159/2020 (5159), SARS-CoV-2/hu/Germany/Jena-  
122 vi005187/2020 (5587) and SARS-CoV-2/hu/Germany/Jena-vi005588/2020 (5588) were  
123 employed. Sequencing of virus isolates verified that all three viral strains belong to  
124 SARS-CoV-2 (species *Severe acute respiratory syndrome-related coronavirus*, genus  
125 *Betacoronavirus*) (Gorbalenya et al., 2020). Phylogenetic analysis revealed a close  
126 relationship of SARS-CoV-2 to the SARS-related coronaviruses RaTG13, bat-SL-  
127 CoVZXC21 and bat-SL-CoVZC45 (Figure 1A). Within the SARS-CoV-2 clade, the  
128 sequences of strains 5587 and 5588 exhibit two base substitutions T8,782C (**nsp1ab**:  
129 synonymous) and C28,144T (**nsp8**: S84L), which are characteristic of the all strains of  
130 lineage L ((Tang et al., 2020) nomenclature) or lineage B ((Rambaut et al., 2020)  
131 nomenclature). Accordingly, 5587 and 5588 clustered with lineage L/lineage B strains

132 in the phylogenetic analysis (Figure 1B). Furthermore, both strains exhibit deletion of  
133 **nsp1ab** D448 and two synonymous substitutions (T514C, C5512T). Beside the **nsp8**  
134 S84L substitution, strain 5159 has accumulated three additional amino acid  
135 substitutions (**S**: D614G, **nsp1ab**: P4715L and **N**: R203K/G204R) which place this virus  
136 in lineage B.1.1 according to the proposed SARS-CoV-2 nomenclature of Rambaut et  
137 al. (2020) (Figure 1B).

138

139 **Mono-culture cells can be infected by SARS-CoV-2 and produce replication**  
140 **complexes at ER-derived membranes.**

141 At first, we infected mono-cell culture systems with SARS-CoV-2 and compared the  
142 infection rate between Vero-76 cells and Calu-3 cells. It is already well known that  
143 Vero-76 cells can be efficiently infected by SARS-CoV-2 (Hoffmann et al., 2020; Shang  
144 et al., 2020). Using transmission electron microscopy (TEM), we could demonstrate  
145 that Vero-76 cells host and efficiently propagate the virus (Figure 2A). Figure 2A  
146 (upper panel) illustrates infected Vero-76 cell containing viral replication organelles.  
147 In the lower-left panel, protein accumulation and generation of double-membrane  
148 vesicles are visible. In the middle panel, virion assembly in the ER–Golgi-intermediate  
149 compartment (ERGIC) and a Golgi complex are imaged containing morphologically  
150 complete viral particles. Here, the particles are packed to be transported to the cellular  
151 surface for virus release, which is demonstrated in the right panel. Some particles are  
152 still attached to the host cell membrane, whereas some viral particles are already fully  
153 released. These results indicate that SARS-CoV-2 induces replication complexes at ER-

154 derived membranes, which were already shown for other types of coronaviruses  
155 (Stertz et al., 2007) and also confirm the findings for Vero E6 cells (Ogando et al., 2020).  
156 To better mimic the situation in the human pulmonary alveoli, we performed the  
157 infection in Calu-3 cells. In Figure 2B, immunofluorescence measurements compare  
158 infected Vero-76 cells with infected Calu-3 cells. In both cell types, viral particles can  
159 be visualized to a similar extent using specific antibodies against SARS-CoV-2 spike  
160 proteins. These results are confirmed by western blot analysis, demonstrating  
161 increased levels of SARS-CoV-2 spike protein in the cell lysates after 8h and 24h  
162 (Figure 2C).

163 Additionally, we could verify progeny virus particles by performing plaque assays  
164 from supernatants of both cell types indicating increased replication during ongoing  
165 infection (Figure 2D). Measuring viral RNA-loads in different infected host cell types,  
166 we found high RNA levels in Vero-76 and Calu-3 cells (Figure S1A). By contrast,  
167 HUVEC mono-cell cultures could not be infected by SARS-CoV-2 (Figure S1B).

168 We further analyzed the host response to the infection by measuring the cytokine  
169 mRNA expression of Calu-3 cells. 24h post-infection, many inflammatory cytokines  
170 were significantly increased compared to control cells (Figure 3). These results reflect  
171 the high cytokine levels found in COVID-19 patients (Costela-Ruiz et al., 2020),  
172 indicating that infected epithelial cells contribute to the “cytokine storm” in severe  
173 COVID-19 cases. Since different cytokines and chemokines are involved in the  
174 infection process, a robust immune response has been associated with a severe clinical  
175 course (Coperchini et al., 2020). Our results clearly show that the epithelial cell line

176 Calu-3 can be efficiently infected by SARS-CoV-2, propagates the virus and answer to  
177 the viral infection with a strong cytokine release.

178

179 **SARS-CoV-2 infects epithelial cells within the alveolus-on-a-chip model causing a**  
180 **strong IFN-response**

181 In the next step, we modified our alveolar-on-a-chip model (Deinhardt-Emmer et al.,  
182 2020a) by seeding Calu-3 cells on the epithelial side, primarily isolated HUVECs on  
183 the endothelial side and integrated PBMCs to represent the immune response.  
184 However, macrophages not show an productive viral replication (Yip et al., 2014), they  
185 are mainly involved in inflammatory response (Kumar et al., 2020).

186 The applied system is ventilated and perfused and can be infected with SARS-CoV-2  
187 via the epithelial side. Using the viral particles isolated from the three COVID-19  
188 patients' specimens, an infection by SARS-CoV-2 on the epithelial cells was proven  
189 and the viral particles were propagated (Figure 4A). This effect was still visible after  
190 40h post-infection (Figure S2A). In response to the infection the epithelial cells reacted  
191 with a robust cytokine response, demonstrated by elevated IFN-levels in the cell  
192 culture supernatants of the epithelial side (Figure 4C).

193 In general, the production of IFN is the most efficient way of fighting viral infections;  
194 e.g. secretion of type I IFN (IFN- $\alpha/\beta$ ) exhibits direct antiviral effects by inhibiting viral  
195 replication (Thiel and Weber, 2008) among many other interferon effects that promote  
196 the immune response to infection (Kindler 2016). Yet, evasion strategies for different



197 types of coronaviruses have been described. The viruses express factors and possess  
198 strategies to inhibit IFN induction/expression (Thoms et al., 2020) or IFN signaling or  
199 to increase IFN resistance, which is reviewed by E. Kindler et al. (2016). Consequently,  
200 SARS-CoV-2 is apparently able to cope with the interferon response of epithelial cells,  
201 which is reflected by our measurements, demonstrating efficient viral replication and  
202 persistence for up to 40h despite a strong epithelial interferon response (Figure 3 and  
203 4).

204 By contrast, we did not detect viral propagation and did not measure an interferon  
205 response at the endothelial side of the biochip (Figure 4C). We could not visualize viral  
206 components within endothelial cells neither at 28h (Figure 4B) nor at 40h post-infection  
207 (Figure S2B) demonstrating that the viral particles do not productively infect  
208 endothelial cells in the human alveolus-on-a-chip model. Additionally, endothelial  
209 mono-cell culture systems could not be infected by SARS-CoV-2 (Figure S1A, B)  
210 confirming the cell-type specificity of the viral pathogens for lung epithelial cells. This  
211 is in line with *in vivo* studies that describe only a weak IFN-response in the serum of  
212 COVID-patients (Hu et al., 2020). In animal models with mouse-adapted SARS virus a  
213 delayed onset of the IFN-response resulting in immune dysregulation was described  
214 (Channappanavar et al., 2016). The weak and delayed IFN-levels in the serum are  
215 probably due to the host cell specificity of SARS-CoV-2, as lung epithelium represents  
216 the main infection focus and endothelial cells are only hardly/not infected.

217 Taken together, these results indicate that endothelial cells of the lung model are not  
218 the primary target cells of SARS-CoV-2 which is in agreement with previous studies

219 (Bar-On et al., 2020). Further, it is in line with the observation that endothelial layer of  
220 the alveolar capillaries of deceased COVID-19 patients were still intact but epithelial  
221 tissue was found seriously damaged (Deinhardt-Emmer et al., 2020b). Although the  
222 mechanism is not clear the increased proinflammatory cytokine release might cause  
223 an endothelial dysfunction. In addition to the origin of endothelial cells from different  
224 organs, comorbidities like obesity and diabetes might render endothelial cells  
225 susceptible to be infected as recently described (Huertas et al., 2020; Pons et al., 2020).  
226 There is clinical evidence for severe courses of COVID-19 in particular, when  
227 preexisting endothelial damage can be suspected (Varga et al., 2020).

228 Further studies are required to elaborate the impact of the endothelial phenotype and  
229 the infection conditions at which these cells are targeted by SARS-CoV-2. In the model  
230 used in this study, the pneumotropic features of SARS-CoV-2 could be confirmed  
231 based on viral uptake and replication in epithelial cells accompanied with an  
232 interferon response described in previous studies. The viral particles were not  
233 transferred to the neighboring endothelial layer, although the cells were co-cultivated  
234 in a bioinspired manner to recreate the alveolar structure.

235

### 236 **SARS-CoV-2 disrupts the alveolar barrier within the alveolus-on-a-chip model**

237 Next, we analyzed the barrier function of the epithelial-endothelial cell layers in our  
238 biochip model. Many clinical case reports and studies describe that critical ill COVID-  
239 patients develop severe lung destructions and a systemic sepsis-like syndrome  
240 (Ackermann et al., 2020; Gao et al., 2020) that could be partly explained by a disrupted

241 barrier function in the lung. From the immunofluorescence image (Figure 4), we could  
242 observe some destruction of the epithelial or endothelial layer, in particular 40h post-  
243 infection (Figure S2). To better visualize the cell-layers during the infection, we  
244 performed scanning electron microscopy (SEM) analysis of the surface structures  
245 following 28h post-infection. On the epithelial side we found dead cells and remnants  
246 attached to the cell layer. Dying cells are identified by shrinking, balling, disruption of  
247 the plasma membrane, and the loss of microvilli, which can be observed in the upper  
248 and middle panel of the infected cells, but to a much lesser extent in mock-treated cells  
249 (Figure 5A, upper panel). Interestingly, at a higher magnification we could display the  
250 viral particles on the surface of the dead cells (Figure 5A, lower panel).

251 It is well known that respiratory viral pathogens induce cell death (including  
252 apoptosis) in the respiratory epithelium, such as the influenza virus (Atkin-Smith et  
253 al., 2018). Already the 2003 SARS-CoV led to apoptotic cell death induced by  
254 membrane proteins via modulation of the Akt-pathway (Chan et al., 2007).  
255 Additionally, prolonged stress of the endoplasmic reticulum (ER) was identified as a  
256 trigger for apoptosis (Fung and Liu, 2014). Within the recent pandemic, it has been  
257 shown that the largest unique open reading frame (ORF) of the SARS-CoV-2 genome  
258 ORF3a is associated with a pro-apoptotic activity (Ren et al., 2020). These studies  
259 indicate that the induction of an apoptotic process in the course of SARS-CoV2  
260 infection is highly probable.

261 By contrast, on the endothelial side, we could not observe differences in the  
262 morphological appearance between SARS-CoV-2-infected and mock-treated cells.

263 Here, the cell integrity of the cell layers appeared intact apart from shrinking artefacts  
264 due to the drying procedure (Figure 5B). At the high magnification (lower panel) dead  
265 cell remnants show granular residues of the cytoplasm indicating the loss of the  
266 plasma membrane, but no viral particles could be visualized.

267 To measure the epithelial and endothelial cell viability we performed LDH-assays on  
268 cells grown in the biochip. 28h post-infection we observed in the infected epithelial  
269 layer a significantly enhanced release of LDH, whereas SARS-CoV-2 did not induce an  
270 enhanced LDH release in endothelial cells (Figure 5D). However, after more extended  
271 infection periods (40h; Figure 5D), the barrier function on the endothelial side was also  
272 affected. These results suggest that even if the endothelial layer is not infected the cell  
273 integrity gets disturbed, most likely by cytokines released by macrophages. In this  
274 respect, it is known that high cytokine/interferon levels can induce the disruption of  
275 the alveolar barrier function (Broggi et al., 2020; Gustafson et al., 2020; Pelaia et al.,  
276 2020).

277 To further analyze the barrier integrity of the biochip system on a functional level, we  
278 performed permeability assays using FITC-dextran to investigate the endothelial and  
279 epithelial cell barrier integrity. We were able to show that SARS-CoV-2 significantly  
280 increased the tissue permeability with its barrier function severely impaired (Figure  
281 5C). As a consequence of the disrupted barrier, we detected viral particles by  
282 performing plaque assays of the cell supernatants in the endothelial chamber at the  
283 late time point of 40h (Figure 5E). These results show that endothelial cells are affected

284 by the viral infection at late time points and that the disturbed cell integrity results in  
285 translocation of the viral particles over the alveolar barrier.

286

## 287 **DISCUSSION**

288 In this manuscript, we present an *in vitro* human alveolus-on-a-chip model based on  
289 human cells that closely mimics alveolar structures and can be efficiently infected by  
290 SARS-CoV-2. The epithelial of the alveolar models was demonstrated to be prone to  
291 SARS-CoV2 infection and to propagate viral replication with high viral loads. These  
292 findings are in line with clinical observations that in lung tissue by far, the highest viral  
293 burdens are measured (Carsana et al., 2020). This phenomenon can be explained by  
294 the cell tropism of SARS-CoV-2 to airway cells that contribute to the high shedding of  
295 viral particles in the respiratory system and the high infectivity of patients via aerosols.  
296 Nevertheless, due to the systemic symptoms in severe COVID-patients, it has been  
297 discussed, whether other cell types besides the airway epithelium, are targeted by  
298 SARS-COV-2, as well. In particular, vascular complications, such as thrombotic events  
299 (Helms et al., 2020), could result from the dissemination and propagation of viral  
300 particles in the endothelial system. In our model system, we could not confirm viral  
301 invasion into endothelial cells, although the cells were cultured in close proximity to  
302 the infected epithelium.

303 Yet, with increased time of infection (40h), the endothelial cells become damaged  
304 resulting in a decline in tissue barrier function. This effect is most likely mediated by

305 the cytokine release of the infected neighboring epithelium. Cytokine release is known  
306 to disturb various cellular functions, such as protein biosynthesis and barrier integrity.  
307 Many studies reveal that most severe cases of SARS-CoV-2 infections are not only due  
308 to enhanced viral burden, but to a large extent due to aberrant immune responses  
309 (Broggi et al., 2020).

310 In our manuscript, we present an infection model that could be further used to study  
311 several aspects during the SARS-CoV-2 infection: (i) At first, the cellular interaction  
312 can be analyzed in detail with increasing complexity. Here, the interaction between  
313 endothelial and epithelial cells, and the role of different immune cells that can be  
314 integrated into the biochip could be elaborated. (ii) Another crucial aspect is  
315 preexisting damage, such as diabetic vascular changes or inflammatory foci that may  
316 promote a COVID-19 infection. These factors can be mimicked in the biochip model to  
317 investigate their impact on infection development. (iii) A third important issue are  
318 novel therapeutic agents. Antiviral and anti-inflammatory therapies can be tested in  
319 the biochip model to obtain initial results on their mode of action.

320 Consequently, our biochip model represents a valuable tool to study many aspects  
321 during COVID-19 infections.

322

## 323 MATERIAL AND METHODS

324 **Virus isolation, propagation and standard plaque-assays.** SARS-CoV-2 was isolated  
325 from the respiratory specimen of three different patients and named (SARS-CoV-  
326 2/hu/Germany/Jena-vi005159/2020 (5159), SARS-CoV-2/hu/Germany/Jena-

327 vi005187/2020 (5587) and SARS-CoV-2/hu/Germany/Jena-vi005188/2020) (5588) (ethic  
328 approval of the Jena University Hospital, no.: 2018-1263) by using Vero-76 cells.  
329 For this, cells were washed 12 h after seeding and infected with 200  $\mu$ l filtered patient  
330 sample (sterilized syringe filter, pore size 0,2  $\mu$ m) under the addition of Panserin 401  
331 (PanBiotech, Germany). After five days, the cytopathic effect was notable. Then, cells  
332 were frozen, centrifuged, and clear supernatants were obtained.  
333 To generate well-defined viral stocks, plaque purification procedures were performed.  
334 For this, confluent Vero-76 cell cultures were infected with serial dilutions of virus  
335 isolates diluted in EMEM for 60 min at 37°C and 5% CO<sub>2</sub>. Thereafter, inoculum was  
336 exchanged with 2 ml MEM/BA (medium with 0.2 % BSA) supplemented with 0.9 %  
337 agar (Oxoid, Wesel, Germany), 0.01 % DEAE-Dextran (Pharmacia Biotech, Germany)  
338 and 0.2% NaHCO<sub>3</sub> until plaque formation was observed. Single plaques were marked  
339 using inverse microscopy. Contents of these plaques were used to infect confluent  
340 Vero-76 cell monolayers in T25 flasks. Cells were incubated at 37°C and 5% CO<sub>2</sub> until  
341 pronounced cytopathic effects were visible. Then, cell cultures were frozen again and  
342 clear supernatants were obtained. This plaque purification procedure was repeated  
343 again. Finally, virus stocks were generated and titrated using plaque assays. For this,  
344 Vero-76 cells were seeded in 6-well plates until a 90 % confluency and infected with  
345 serial dilutions of the supernatants in PBS/BA (1 mM MgCl<sub>2</sub>, 0,9 mM CaCl, 0,2 % BSA,  
346 100 U/ml Pen/Strep) for 90 min at 37°C. After aspiration of the inoculum, cells were  
347 incubated with 2 ml MEM/BA (medium with 0.2 % BSA) supplemented with 0.9 %  
348 agar (Oxoid, Wesel, Germany), 0.01 % DEAE-Dextran (Pharmacia Biotech, Germany)

349 and 0,2% NaHCO<sub>3</sub> at 37°C and 5 % CO<sub>2</sub> for four days. The visualization was  
350 performed by the staining with crystal violet solution (0.2 % crystal violet, 20 %  
351 ethanol, 3.5 % formaldehyde in water) and the number of infectious particles (plaque-  
352 forming units (PFU) ml<sup>-1</sup>) was determined.

353

354 **Sequencing and genome reconstruction.** Library preparation was performed  
355 according to the “nCoV-2019 sequencing protocol”  
356 ([dx.doi.org/10.17504/protocols.io.bdp7i5rn](https://dx.doi.org/10.17504/protocols.io.bdp7i5rn)) from the ARTICnetwork  
357 (<https://artic.network/ncov-2019>). Briefly, viral RNA was isolated for SARS-CoV-2  
358 virus strains 5159, 5587, and 5588 via the QIAmp viral RNA Kit (Qiagen, Hilden,  
359 Germany) according to the manufacturers' guide. The cDNA preparation was  
360 performed using the SuperScript IV (Thermofisher), followed by a multiplex PCR to  
361 generate overlapping 400 nt amplicons using version 3 of the primer set  
362 ([https://github.com/artic-network/artic-ncov2019/tree/master/primer\\_schemes/nCoV-](https://github.com/artic-network/artic-ncov2019/tree/master/primer_schemes/nCoV-2019/V3)  
363 [2019/V3](https://github.com/artic-network/artic-ncov2019/tree/master/primer_schemes/nCoV-2019/V3)). After PCR cleanup, library preparation was performed using the Ligation  
364 Sequencing Kit (LSK-109, Oxford Nanopore Technologies) and the Native Barcoding  
365 Expansion (EXP-NBD104, native Barcoding Kit (Oxford Nanopore Technologies)).  
366 Sequencing was performed on a MinION device using an R.9.4.1 flow cell (Oxford  
367 Nanopore Technologies). Basecalling and genome reconstruction was performed  
368 using poreCov v.0.2 with the default settings (<https://github.com/replikation/poreCov>).

369



370 **Cell culture and virus infection.** Vero-76 cells were cultured in EMEM with HEPES  
371 modification, and 5 mM L-Glutamine. Calu-3 cells were cultured in RPMI-1640  
372 supplemented with 10 % fetal calves' serum (FCS). M199 was purchased from Lonza  
373 (Verviers, Belgium), fetal calf serum (FCS), human serum and endothelial growth  
374 supplement were from Sigma (Taufkirchen, Germany).

375 PBMCs were isolated and cultivated as previously described (Deinhardt-Emmer et al.,  
376 2020a). Human umbilical vein endothelial cells (HUVEC) were isolated from  
377 anonymously acquired human umbilical cords according to the Declaration of  
378 Helsinki, "Ethical principles for Medical Research Involving Human Subjects" (1964).  
379 After rinsing the cord veins with 0.9 % NaCl, endothelial cells were detached with  
380 collagenase (0.01 %, 3 min at 37 °C), suspended in M199/10 % FCS, washed once (500  
381 x g, 6 min) and seeded on a cell culture flask coated with 0.2 % gelatin. 24 h later, full  
382 growth medium was added (M199, 17.5 % FCS, 2.5 % human serum, 7.5 µg/ml  
383 endothelial mitogen, 7.5 U/ml heparin, 680 µM glutamine, 100 µM vitamin C, 100 U/ml  
384 penicillin, 100 µg/ml streptomycin). HUVEC from the second passage were seeded on  
385 30-mm dishes or on 90-mm dishes at a density of 27,500 cells/cm<sup>2</sup>. Experiments were  
386 performed 72 h after seeding. For the cultivation of the human alveolus-on-a-chip  
387 model we used Calu-3 cells and macrophages at the epithelial side, and HUVECs at  
388 the endothelial side. The Multiorgan tissue flow (MOTiF) biochips were manufactured  
389 and obtained from microfluid ChipShop GmbH (Jena, Germany), as explained  
390 previously (Deinhardt-Emmer et al., 2020a).

391 For infection of Vero-76 or Calu-3 cells, cells were washed with PBS and either left  
392 uninfected (mock) or infected with SARS-CoV-2 with a multiplicity of infection (MOI)  
393 of 1 for 120 min in medium (EMEM with HEPES modification and 5 mM L-Glutamine  
394 for Vero-76 cells and RPMI 1640 for Calu-3 cells) supplemented with 10 % FCS.  
395 Subsequently, supernatants were removed, and cells were supplemented with fresh  
396 medium supplemented with 10 % FCS and further incubated for the times indicated  
397 at 37°C, 5 % CO<sub>2</sub>.

398 For the infection of the human alveolus-on-a-chip, cells were washed with PBS once,  
399 followed by treatment with PBS (mock) at 37°C and RPMI (0.2 % autologous human  
400 serum, 1 mM MgCl<sub>2</sub>, 0.9 mM CaCl<sub>2</sub>) or infection with SARS-CoV-2 virus (1 MOI). After  
401 90 min incubation cells were washed and supplemented with medium. Afterwards,  
402 cells were incubated for the indicated times at 37°C, 5 % CO<sub>2</sub>.

403

404 **Transmission electron microscopy.** Confluent monolayers of Vero-76 cells (9 cm petri  
405 dishes) were infected with SARS-CoV-2 (isolate 5159) using an MOI of 1. After 24 h,  
406 supernatants were removed, and samples were fixed with freshly prepared modified  
407 Karnovsky fixative consisting of 4 % w/v paraformaldehyde and 2.5 % v/v  
408 glutaraldehyde in 0.1 M sodium cacodylate buffer pH 7.4 for 1h at room temperature.  
409 After washing 3 times for 15 min each with 0.1 M sodium cacodylate buffer (pH 7.4)  
410 the cells were post-fixed with 2 % w/v osmium tetroxide for 1h at room temperature.  
411 Subsequently, the cells were rewashed with 0.1 M sodium cacodylate buffer (pH 7.4),  
412 thoroughly scraped off the petri dishes, and pelleted by centrifuging at 600 x g for 10

413 min. During the following dehydration in ascending ethanol series, post-staining with  
414 1 % w/v uranyl acetate was performed. Afterwards, the pellets were embedded in  
415 epoxy resin (Araldite) and ultrathin sectioned (70 nm) using a Leica Ultracut S (Leica,  
416 Wetzlar, Germany). Finally, the sections were mounted on filmed Cu grids, post-  
417 stained with lead citrate, and studied in a transmission electron microscope (EM 900,  
418 Zeiss, Oberkochen, Germany) at 80 kV and magnifications of 3,000x to 85,000x. For  
419 image recording, a 2K slow-scan CCD camera (TRS, Moorenweis, Germany) was used.

420

421 **Immunofluorescence microscopy.** Membranes of the human alveolus-on-a-chip were  
422 fixed for at least 30 min with 4 % paraformaldehyde at 37°C and permeabilized with  
423 0.1 % saponin buffer for one hour at room temperature. For the alveolus-on-a-chip  
424 model the membrane was removed from the chip after fixation and before  
425 permeabilization and cut in two halves to analyze either the epithelial or the  
426 endothelial side. Infection by SARS-CoV-2 was visualized using mouse anti-SARS-  
427 CoV-2 spike (GeneTex; #GTX632604) IgG monoclonal, primary antibodies and  
428 AlexaFluor® goat anti-mouse IgG polyclonal antibodies (Dianova; # 115-545-146). The  
429 nuclei were stained with bisBenzimide H 33342 trihydrochloride (Hoechst 33342)  
430 (Merck; #14533). Rabbit anti-E-cadherin IgG monoclonal (CellSignaling; 3195S) or  
431 rabbit anti-VE-cadherin polyclonal, primary antibodies (CellSignaling; 2158S) and Cy5  
432 goat anti-mouse IgG polyclonal antibodies (Dianova; #111-175-144) were used to  
433 detect cell borders of Calu-3 or HUVEC cells on the membrane of the alveolus-on-a-  
434 chip model, respectively. Primary antibodies were added 1:100, overnight at 4°C.

435 Afterwards, secondary antibodies and Hoechst 33342 were added 1:100 and 1:1000 for  
436 1 h, at room temperature and in the dark. Cells and membranes were mounted with  
437 fluorescence mounting media (Dako; #S3023).

438 Images were acquired using an Axio Observer.Z1 microscope (Zeiss) with Plan  
439 Apochromat 20x/0.8 objective (Zeiss), ApoTome.2 (Zeiss) and AxioCam 503 mono  
440 (Zeiss) and the software Zen 2.6 (blue edition; Zeiss). Apotome defolding with phase  
441 error correction and deconvolution was done by the software Zen 2.6 as well. Fiji V  
442 1.52b (ImageJ) was used for further image processing, including Z-stack merging with  
443 maximum intensity projection and gamma correction. Parameters were kept the same  
444 for all pictures which were compared with each other.

445

446 **Scanning electron microscopy.** The fixation of the cells was performed inside the  
447 human alveolus-on-a-chip model by using the same fixative as for TEM for 60 min at  
448 room temperature as described previously (Deinhardt-Emmer et al., 2020a; Maurer et  
449 al., 2019; Rennert et al., 2015). Afterwards, the chips were rinsed three times with fresh  
450 cacodylate buffer for 10 min each and the membranes were cut out. After post-fixation  
451 with 2 % w/v osmiumtetroxide for 1h the samples were dehydrated in ascending  
452 ethanol concentrations (30, 50, 70, 90 and 100 %) for 15 min each. Subsequently, the  
453 samples were critical-point dried using liquid CO<sub>2</sub> and sputter coated with gold  
454 (thickness approx. 2 nm) using a CCU-010 sputter coater (safematic GmbH, Zizers,  
455 Switzerland). The specimens were investigated with a field emission SEM LEO-1530  
456 Gemini (Carl Zeiss NTS GmbH, Oberkochen, Germany).

457

458 **Western-Blot Analysis.** For western blotting, cells were lysed with Triton lysis buffer  
459 (TLB; 20 mM Tris-HCl, pH 7.4; 137 mM NaCl; 10% Glycerol; 1% Triton X-100; 2  
460 mM EDTA; 50 mM sodium glycerophosphate, 20 mM sodium pyrophosphate; 5  
461  $\mu\text{g ml}^{-1}$  aprotinin; 5  $\mu\text{g ml}^{-1}$  leupeptin; 1 mM sodium vanadate and 5 mM  
462 benzamidine) for 30 min. Cell lysates were cleared by centrifugation, supplemented  
463 with 5x Lämmli buffer (10% SDS, 50% glycerol, 25% 2-mercaptoethanol, 0.02%  
464 bromophenol blue, 312 mM Tris 6.8 pH) (diluted 1:5), boiled for 10 min (95°C), and  
465 subjected to SDS-PAGE and subsequent blotting. For the detection of SARS-CoV-2  
466 spike protein a rabbit polyclonal anti-SARS-CoV-2 spike S2 antibody (Sino Biological  
467 #40590-T62) was used.

468

469 **Lactate Dehydrogenase Cytotoxicity Assay.** Cell cytotoxicity was determined with  
470 CyQUANT Lactate Dehydrogenase (LDH) Cytotoxicity Assay Kit (Invitrogen/Thermo  
471 Fisher Scientific, Waltham, USA) according to the manufacturer's instructions. Cells  
472 were infected as previously described. After infection 25  $\mu\text{l}$  of the supernatant was  
473 transferred in technical duplicates to a 96-well plate and mixed with 25  $\mu\text{l}$  of the LDH  
474 cytotoxicity assay reagent. The plate was incubated at 37°C for 30 min. Stop-Solution  
475 (25  $\mu\text{l}$ ) was added, and  $\text{OD}_{492\text{nm}}$  was directly measured using a TECAN Spectra fluor  
476 plate reader (Tecan Group Ltd, Maennedorf, Switzerland). The  $\text{OD}_{620\text{nm}}$  was subtracted  
477 to correct for background signal.

478

479 **Permeability Assay.** To test the permeability of the epithelial and endothelial barrier,  
480 1 mg ml<sup>-1</sup> of 3–5 kDa fluorescein isothio-cyanate (FITC)-dextran (Sigma-Aldrich,  
481 Germany) in phenol-red free DMEM/F12 medium (Sigma-Aldrich, Germany) was  
482 injected into the upper chamber of the chip. The lower chamber contained only phenol  
483 red free DMEM/F12. The alveolus model was incubated for 60 min under static  
484 conditions. Afterwards, the media from the lower and upper chambers were collected,  
485 and fluorescence intensity (exc. 488nm; em. 518 nm) was measured in a 96-well  $\mu$ Clear  
486 black plate (Greiner BioOne, Frickenhausen, Germany) by a BMG Labtech FLUOStar  
487 Omega microplate reader (BMG Labtech GmbH, Ortenberg, Germany). The  
488 permeability coefficient ( $P_{app}$ ) was calculated according to  $P_{app}$  (cm s<sup>-1</sup>) = (dQ/dt)  
489 (1/AC<sub>0</sub>). For this, dQ/dt represent the steady-state flux (g s<sup>-1</sup>),  $A$  the culture surface area  
490 (cm<sup>2</sup>) and C<sub>0</sub> the initial concentration (mg ml<sup>-1</sup>) (Thomas et al., 2017).

491

492 **Detection of mRNA-expression by using qRT-PCR.** For RNA isolation cells were  
493 lysed with 350  $\mu$ l RLT lysis buffer and detached from the plate using a rubber cell  
494 scraper. RNA isolation was performed using the RNeasy Mini Kit (QIAGEN, Hilden,  
495 Germany) according to the manufacturer's protocol. RNA concentration was  
496 measured using the Nano Drop Spectrophotometer ND-1000 (preqlab/vwr, Radnor,  
497 USA).

498 For cDNA synthesis, the QuantiNova Reverse Transcription Kit (QIAGEN, Venlo,  
499 Netherlands) was used. RNA was thawed on ice. 400 nanogram (ng) RNA were  
500 diluted in RNase free water to a volume of 13  $\mu$ l. 2  $\mu$ l gDNA removal mix were added

501 to the diluted RNA; followed by incubation at 45°C for 2 min. After incubating the  
502 samples for at least 1 min on ice, 5 µl of RT master mix (containing 4 µl Reverse  
503 Transcription Mix and 1 µl Reverse Transcription enzyme per sample) were added.  
504 The resulting mixture was incubated for 3 min at 25°C, followed by incubation at 45°C  
505 for 10 min and an inactivation step at 85°C for 5 min. The cDNA was either directly  
506 used for the subsequent experiments or stored at -20°C.

507 qRT-PCRs were performed using the QuantiNova SYBR Green PCR Kit (QIAGEN,  
508 Venlo, Netherlands). 1 µl cDNA was added to 19 µl master mix (containing 10 µl SYBR  
509 Green, 1.5 µl Forward Primer (10 µM), 1.5 µl Reverse Primer (10 µM) and 6 µL RNase  
510 free ddH<sub>2</sub>O per sample; for primer sequences see table 1), and the real time PCR  
511 reaction was started using the following cycle conditions: 95°C for 2 min, followed by  
512 40 cycles of 95°C for 5 sec and 60°C for 10 sec. The qPCR cycle was ended by a stepwise  
513 temperature-increase from 60°C to 95°C (1°C every 5 sec).

514

515 **Detection of SARS-CoV-2 by using qRT-PCR.** For the determination of SARS-CoV-  
516 2, we used the QIAamp Viral RNA Mini Kit (Qiagen, Hilden, Germany) according to  
517 manufacturer's guide. A qRT-PCR from RIDAgene (r-biopharm, Darmstadt,  
518 Germany) followed on Rotor-Gene Q (Qiagen, Hilden, Germany) to detect the E-gene  
519 of SARS-CoV-2. The RNA standard curve, prepared from the positive control of the  
520 RIDAgene (r-biopharm, Darmstadt, Germany) kit, Cycle conditions were set as  
521 follows: 10 min at 58°C, 1 min at 95°C and 45 cycles of 95°C for 15 sec and 60°C for 30  
522 sec.

523

524 **Statistical analysis.** Statistical analyses were performed using Prism 8 (GraphPad  
525 Software). Statistical methods are described in the figure legends.

526

## 527 **Funding**

528 The authors acknowledge the support by grants of the BMBF (01KI20168) and the Carl  
529 Zeiss Foundation. The authors further acknowledge the support of this work by a  
530 grant from the IZKF (ACSP02) (SDE). The study was further funded by the Deutsche  
531 Forschungsgemeinschaft (DFG, German Research Foundation) under Germany's  
532 Excellence Strategy – EXC 2051 – Project-ID 390713860. We acknowledge support by  
533 the German Research Foundation and the Open Access Publication Fund of the  
534 Thueringer Universitaets- und Landesbibliothek Jena Projekt Nr. 433052568.

535

536 **Author contributions.** SDE, BL and CE conceived and designed the experiments, SDE,  
537 SB, CH, LG, AH, RZ, FH, CB, MM, MS, and SN performed the experiments, SDE, SB,  
538 CH, LG, RZ, ASM, CB, SN, BL and CE analyzed the data, SDE, BL and CE wrote the  
539 manuscript, SDE, ASM, MWP, RH, SN, BL and CE provided resources. All authors  
540 critically read and commented on the manuscript.

541

## 542 **Acknowledgments**

543 We thank the team at the Placenta Laboratory of the Jena University Hospital for  
544 supplying umbilical cords for HUVEC isolation and the excellent technical work of



545 Elke Teuscher regarding the preparation. Furthermore, we thank Stefanie Kynast for  
546 the excellent cell cultivation and laboratory assistance. The authors also thank Anika  
547 Hopf (Center for Electron Microscopy) for her excellent work in sample preparation.

## 548 **References**

- 549 Ackermann, M., S.E. Verleden, M. Kuehnel, A. Haverich, T. Welte, F. Laenger, A. Vanstapel, C.  
550 Werlein, H. Stark, A. Tzankov, W.W. Li, V.W. Li, S.J. Mentzer, and D. Jonigk. 2020.  
551 Pulmonary Vascular Endothelialitis, Thrombosis, and Angiogenesis in Covid-19. *New*  
552 *England Journal of Medicine* 383:120-128.
- 553 Atkin-Smith, G.K., M. Duan, W. Chen, and I.K.H. Poon. 2018. The induction and  
554 consequences of Influenza A virus-induced cell death. *Cell Death & Disease* 9:1002.
- 555 Bar-On, Y.M., A. Flamholz, R. Phillips, and R. Milo. 2020. SARS-CoV-2 (COVID-19) by the  
556 numbers. *eLife* 9:e57309.
- 557 Becker, R.C. 2020. COVID-19 update: Covid-19-associated coagulopathy. *J Thromb*  
558 *Thrombolysis* 50:54-67.
- 559 Bestle, D., M.R. Heindl, H. Limburg, T. Van Lam van, O. Pilgram, H. Moulton, D.A. Stein, K.  
560 Hardes, M. Eickmann, O. Dolnik, C. Rohde, H.D. Klenk, W. Garten, T. Steinmetzer, and  
561 E. Böttcher-Friebertshäuser. 2020. TMPRSS2 and furin are both essential for  
562 proteolytic activation of SARS-CoV-2 in human airway cells. *Life Sci Alliance* 3:  
563 Broggi, A., S. Ghosh, B. Sposito, R. Spreafico, F. Balzarini, A. Lo Cascio, N. Clementi, M. De  
564 Santis, N. Mancini, F. Granucci, and I. Zanoni. 2020. Type III interferons disrupt the  
565 lung epithelial barrier upon viral recognition. *Science (New York, N.Y.)*
- 566 Carsana, L., A. Sonzogni, A. Nasr, R.S. Rossi, A. Pellegrinelli, P. Zerbi, R. Rech, R. Colombo, S.  
567 Antinori, M. Corbellino, M. Galli, E. Catena, A. Tosoni, A. Gianatti, and M. Nebuloni.  
568 2020. Pulmonary post-mortem findings in a series of COVID-19 cases from northern  
569 Italy: a two-centre descriptive study. *The Lancet Infectious Diseases*
- 570 Chan, C.-M., C.-W. Ma, W.-Y. Chan, and H.Y.E. Chan. 2007. The SARS-Coronavirus Membrane  
571 protein induces apoptosis through modulating the Akt survival pathway. *Arch*  
572 *Biochem Biophys* 459:197-207.
- 573 Channappanavar, R., A.R. Fehr, R. Vijay, M. Mack, J. Zhao, D.K. Meyerholz, and S. Perlman.  
574 2016. Dysregulated Type I Interferon and Inflammatory Monocyte-Macrophage  
575 Responses Cause Lethal Pneumonia in SARS-CoV-Infected Mice. *Cell Host Microbe*  
576 19:181-193.
- 577 Coperchini, F., L. Chiovato, L. Croce, F. Magri, and M. Rotondi. 2020. The cytokine storm in  
578 COVID-19: An overview of the involvement of the chemokine/chemokine-receptor  
579 system. *Cytokine Growth Factor Rev* 53:25-32.
- 580 Costela-Ruiz, V.J., R. Illescas-Montes, J.M. Puerta-Puerta, C. Ruiz, and L. Melguizo-Rodríguez.  
581 2020. SARS-CoV-2 infection: The role of cytokines in COVID-19 disease. *Cytokine*  
582 *Growth Factor Rev* S1359-6101(1320)30109-X.
- 583 Deinhardt-Emmer, S., K. Rennert, E. Schicke, Z. Cseresnyés, M. Windolph, S. Nietzsche, R.  
584 Heller, F. Siwczak, K.F. Haupt, S. Carlstedt, M. Schacke, M.T. Figge, C. Ehrhardt, B.  
585 Löffler, and A.S. Mosig. 2020a. Co-infection with Staphylococcus aureus after primary  
586 influenza virus infection leads to damage of the endothelium in a human alveolus-on-  
587 a-chip model. *Biofabrication* 12:025012.

- 588 Deinhardt-Emmer, S., D. Wittschieber, J. Sanft, S. Kleemann, S. Elschner, K.F. Haupt, V. Vau,  
589 C. Häring, J. Rödel, A. Henke, C. Ehrhardt, M. Bauer, M. Philipp, N. Gaßler, S.  
590 Nietzsche, B. Löffler, and G. Mall. 2020b. Early postmortem mapping of SARS-CoV-2  
591 RNA in patients with COVID-19 and correlation to tissue damage. *bioRxiv*  
592 2020.2007.2001.182550.
- 593 Fung, T.S., and D.X. Liu. 2014. Coronavirus infection, ER stress, apoptosis and innate  
594 immunity. *Front Microbiol* 5:
- 595 Gao, Y.M., G. Xu, B. Wang, and B.C. Liu. 2020. Cytokine storm syndrome in coronavirus  
596 disease 2019: A narrative review. *J Intern Med*
- 597 George, P.M., A.U. Wells, and R.G. Jenkins. 2020. Pulmonary fibrosis and COVID-19: the  
598 potential role for antifibrotic therapy. *The Lancet Respiratory Medicine*
- 599 Gorbalenya, A.E., S.C. Baker, R.S. Baric, R.J. de Groot, C. Drosten, A.A. Gulyaeva, B.L.  
600 Haagmans, C. Lauber, A.M. Leontovich, B.W. Neuman, D. Penzar, S. Perlman, L.L.M.  
601 Poon, D.V. Samborskiy, I.A. Sidorov, I. Sola, J. Ziebuhr, and V. Coronaviridae Study  
602 Group of the International Committee on Taxonomy of. 2020. The species Severe  
603 acute respiratory syndrome-related coronavirus: classifying 2019-nCoV and naming it  
604 SARS-CoV-2. *Nature microbiology* 5:536-544.
- 605 Gustafson, D., S. Raju, R. Wu, C. Ching, S. Veitch, K. Rathnakumar, E. Boudreau, K.L. Howe,  
606 and J.E. Fish. 2020. Overcoming Barriers: The Endothelium As a Linchpin of  
607 Coronavirus Disease 2019 Pathogenesis? *Arterioscler Thromb Vasc Biol* 40:1818-  
608 1829.
- 609 Helms, J., C. Tacquard, F. Severac, I. Leonard-Lorant, M. Ohana, X. Delabranche, H. Merdji, R.  
610 Clere-Jehl, M. Schenck, F. Fagot Gandet, S. Fafi-Kremer, V. Castelain, F. Schneider, L.  
611 Grunebaum, E. Anglés-Cano, L. Sattler, P.-M. Mertes, F. Meziani, and C.T. Group.  
612 2020. High risk of thrombosis in patients with severe SARS-CoV-2 infection: a  
613 multicenter prospective cohort study. *Intensive Care Med* 46:1089-1098.
- 614 Hoffmann, M., H. Kleine-Weber, S. Schroeder, N. Krüger, T. Herrler, S. Erichsen, T.S.  
615 Schiergens, G. Herrler, N.H. Wu, A. Nitsche, M.A. Müller, C. Drosten, and S.  
616 Pöhlmann. 2020. SARS-CoV-2 Cell Entry Depends on ACE2 and TMPRSS2 and Is  
617 Blocked by a Clinically Proven Protease Inhibitor. *Cell* 181:271-280.e278.
- 618 Hu, B., S. Huang, and L. Yin. 2020. The cytokine storm and COVID-19. *Journal of Medical*  
619 *Virology* n/a:
- 620 Huertas, A., D. Montani, L. Savale, J. Pichon, L. Tu, F. Parent, C. Guignabert, and M. Humbert.  
621 2020. Endothelial cell dysfunction: a major player in SARS-CoV-2 infection (COVID-  
622 19)? *European Respiratory Journal* 2001634.
- 623 Kumar, S., R. Nyodu, V.K. Maurya, and S.K. Saxena. 2020. Host Immune Response and  
624 Immunobiology of Human SARS-CoV-2 Infection. *Coronavirus Disease 2019 (COVID-  
625 19)* 43-53.
- 626 Maurer, M., M.S. Gresnigt, A. Last, T. Wollny, F. Berlinghof, R. Pospich, Z. Cseresnyes, A.  
627 Medyukhina, K. Graf, M. Gröger, M. Raasch, F. Siwczak, S. Nietzsche, I.D. Jacobsen,  
628 M.T. Figge, B. Hube, O. Huber, and A.S. Mosig. 2019. A three-dimensional  
629 immunocompetent intestine-on-chip model as in vitro platform for functional and  
630 microbial interaction studies. *Biomaterials* 220:119396.
- 631 Ogando, N.S., T.J. Dalebout, J.C. Zevenhoven-Dobbe, R.W. Limpens, Y. van der Meer, L. Caly,  
632 J. Druce, J.J.C. de Vries, M. Kikkert, M. Bárcena, I. Sidorov, and E.J. Snijder. 2020.  
633 SARS-coronavirus-2 replication in Vero E6 cells: replication kinetics, rapid adaptation  
634 and cytopathology. *bioRxiv* 2020.2004.2020.049924.

- 635 Pelaia, C., C. Tinello, A. Vatrella, G. De Sarro, and G. Pelaia. 2020. Lung under attack by  
636 COVID-19-induced cytokine storm: pathogenic mechanisms and therapeutic  
637 implications. *Ther Adv Respir Dis* 14:1753466620933508.
- 638 Pons, S., S. Fodil, E. Azoulay, and L. Zafrani. 2020. The vascular endothelium: the cornerstone  
639 of organ dysfunction in severe SARS-CoV-2 infection. *Crit Care* 24:353-353.
- 640 Rambaut, A., E.C. Holmes, Á. O'Toole, V. Hill, J.T. McCrone, C. Ruis, L. du Plessis, and O.G.  
641 Pybus. 2020. A dynamic nomenclature proposal for SARS-CoV-2 lineages to assist  
642 genomic epidemiology. *Nature microbiology*
- 643 Ren, Y., T. Shu, D. Wu, J. Mu, C. Wang, M. Huang, Y. Han, X.-Y. Zhang, W. Zhou, Y. Qiu, and X.  
644 Zhou. 2020. The ORF3a protein of SARS-CoV-2 induces apoptosis in cells. *Cellular &*  
645 *Molecular Immunology*
- 646 Rennert, K., S. Steinborn, M. Gröger, B. Ungerböck, A.M. Jank, J. Ehgartner, S. Nietzsche, J.  
647 Dinger, M. Kiehntopf, H. Funke, F.T. Peters, A. Lupp, C. Gärtner, T. Mayr, M. Bauer, O.  
648 Huber, and A.S. Mosig. 2015. A microfluidically perfused three dimensional human  
649 liver model. *Biomaterials* 71:119-131.
- 650 Shang, J., Y. Wan, C. Luo, G. Ye, Q. Geng, A. Auerbach, and F. Li. 2020. Cell entry mechanisms  
651 of SARS-CoV-2. *Proceedings of the National Academy of Sciences* 117:11727.
- 652 Stertz, S., M. Reichelt, M. Spiegel, T. Kuri, L. Martínez-Sobrido, A. García-Sastre, F. Weber,  
653 and G. Kochs. 2007. The intracellular sites of early replication and budding of SARS-  
654 coronavirus. *Virology* 361:304-315.
- 655 Tang, X., C. Wu, X. Li, Y. Song, X. Yao, X. Wu, Y. Duan, H. Zhang, Y. Wang, Z. Qian, J. Cui, and J.  
656 Lu. 2020. On the origin and continuing evolution of SARS-CoV-2. *National Science*  
657 *Review* 7:1012-1023.
- 658 Thiel, V., and F. Weber. 2008. Interferon and cytokine responses to SARS-coronavirus  
659 infection. *Cytokine Growth Factor Rev* 19:121-132.
- 660 Thomas, L., Z. Rao, J. Gerstmeier, M. Raasch, C. Weinigel, S. Rummeler, D. Menche, R. Muller,  
661 C. Pergola, A. Mosig, and O. Werz. 2017. Selective upregulation of TNFalpha  
662 expression in classically-activated human monocyte-derived macrophages (M1)  
663 through pharmacological interference with V-ATPase. *Biochemical pharmacology*  
664 130:71-82.
- 665 Thoms, M., R. Buschauer, M. Ameisemeier, L. Koepke, T. Denk, M. Hirschenberger, H. Kratzat,  
666 M. Hayn, T. Mackens-Kiani, J. Cheng, J.H. Straub, C.M. Stürzel, T. Fröhlich, O.  
667 Berninghausen, T. Becker, F. Kirchhoff, K.M.J. Sparrer, and R. Beckmann. 2020.  
668 Structural basis for translational shutdown and immune evasion by the Nsp1 protein  
669 of SARS-CoV-2. *Science (New York, N.Y.)* eabc8665.
- 670 Varga, Z., A.J. Flammer, P. Steiger, M. Haberecker, R. Andermatt, A.S. Zinkernagel, M.R.  
671 Mehra, R.A. Schuepbach, F. Ruschitzka, and H. Moch. 2020. Endothelial cell infection  
672 and endotheliitis in COVID-19. *The Lancet* 395:1417-1418.
- 673 Wichmann, D., J.-P. Sperhake, M. Lütgehetmann, S. Steurer, C. Edler, A. Heinemann, F.  
674 Heinrich, H. Mushumba, I. Kniep, A.S. Schröder, C. Burdelski, G. de Heer, A. Nierhaus,  
675 D. Frings, S. Pfefferle, H. Becker, H. Bredereke-Wiedling, A. de Weerth, H.-R. Paschen,  
676 S. Sheikhzadeh-Eggers, A. Stang, S. Schmiedel, C. Bokemeyer, M.M. Addo, M.  
677 Aepfelbacher, K. Püschel, and S. Kluge. 2020. Autopsy Findings and Venous  
678 Thromboembolism in Patients With COVID-19. *Annals of Internal Medicine*
- 679 Yip, M.S., N.H.L. Leung, C.Y. Cheung, P.H. Li, H.H.Y. Lee, M. Daëron, J.S.M. Peiris, R. Bruzzone,  
680 and M. Jaume. 2014. Antibody-dependent infection of human macrophages by  
681 severe acute respiratory syndrome coronavirus. *Virology* 11:82-82.
- 682

683  
684  
685  
686  
687  
688  
689  
690

## 691 **Figure legends**

### 692 **Figure 1: Phylogenetic tree of SARS-CoV-2.**

693 (A) Phylogenetic analysis revealed a close relationship of SARS-CoV-2 to the SARS-  
694 related coronaviruses RaTG13, bat-SL-CoVZXC21 and bat-SL-CoVZC45. Sequences of  
695 strains 5587 and 5588 exhibit two base substitutions T8,782C (**nsp1ab**: synonymous)  
696 and C28,144T (**nsp8**: S84L). (B) Accordingly, 5587 and 5588 clustered with lineage  
697 L/lineage B strains in the phylogenetic analysis. Both strains exhibit deletion of **nsp1ab**  
698 D448 and two synonymous substitutions (T514C, C5512T). Beside the **nsp8** S84L  
699 substitution, strain 5159 has accumulated three additional amino acid substitutions (**S**:  
700 D614G, **nsp1ab**: P4715L and **N**: R203K/G204R) which place this virus in lineage B.1.1.

701

### 702 **Figure 2: SARS-CoV-2 replicates in Vero-76 and Calu-3 cells.**

703 Vero-76 (A-D) and Calu-3 (B-D) cells were left uninfected (mock) (B-D) or were  
704 infected (A-D) with a SARS-CoV-2 patient isolate (5159) (MOI=1).

705 (A) Transmission electron microscopy was performed 24h post infection (p.i.): (upper  
706 panel, scale bar: 5  $\mu$ m) overview of 3 SARS-CoV-2-infected Vero-76 cells; (lower left  
707 panel, scale bar: 200 nm) generation of double membrane vesicles; (lower middle  
708 panel, scale bar: 200 nm) virion assembly in the ER–Golgi-intermediate compartment

709 (ERGIC); (lower right panel, scale bar: 200 nm) viral release. (B) SARS-CoV-2 was  
710 visualized by detection of the spike protein via a spike-specific antibody and an Alexa  
711 Fluor™ 488-conjugated goat anti-mouse IgG (green). The nuclei were stained with  
712 Hoechst 33342 (blue). Immunofluorescence (IF) microscopy was acquired by use of the  
713 Axio Observer.Z1 (Zeiss) with a 200×magnification. (C) Total cell lysates were  
714 harvested at the times indicated and expression of the spike protein was analyzed by  
715 western-blot assay. ERK2 served as loading control. (D) Progeny virus particles were  
716 measured in the supernatant by standard plaque assay at the indicated times post  
717 infection. Shown are means ( $\pm$ SD) of plaque forming units (PFU) ml<sup>-1</sup> of three  
718 independent experiments including two biological samples. Statistical significance  
719 was analyzed by unpaired, two-tailed t-test (\*\*p < 0.001).

720

721 **Figure 3: SARS-CoV-2 infection results in induction of antiviral and**  
722 **proinflammatory mRNA synthesis.**

723 Calu-3 cells were left uninfected (mock) or were infected with a SARS-CoV-2 patient  
724 isolate (5159, 5587, 5588) (MOI=1). RNA-lysates were performed 24h p.i. Levels of  
725 IFN $\alpha$ , IFN $\beta$ , IFN $\lambda$ 1, IFN $\lambda$ 2,3, IL6, IL8, IP10, TNF $\alpha$ , cIAP2, TRAIL, and RIPK1 mRNA  
726 were measured of three patient isolate (5159, 5587, 5588) and two technical samples in  
727 3 independent experiments. Means  $\pm$  SD of three independent experiments are shown.  
728 Levels of mock-treated samples were arbitrarily set as 1. After normalization, two-  
729 tailed unpaired t-tests were performed for comparison of mock-treated and SARS-  
730 CoV-2-infected and samples. (\*p < 0.05, \*\*p < 0.01, \*\*\*p < 0.001, \*\*\*\*p < 0.0001).

731

732 **Figure 4: SARS-CoV-2 efficiently infects epithelial cells of the human-alveolus-on-**  
733 **a chip model and provokes type I and III interferon production.**

734 (A-C) The epithelial chamber of the alveolus-on-a-chip model was left uninfected  
735 (mock) or infected with three different SARS-CoV-2 patient isolates (5159, 5587, 5588)  
736 (MOI=1). (A, B) Immunofluorescence staining was performed 28h p.i. and analyzed by  
737 immunofluorescence microscopy (Axio Observer.Z1 (Zeiss)). (A) The E-cadherin of  
738 the epithelial layer and the (B) VE-cadherin of the endothelial layer were visualized by  
739 an anti-E-Cadherin-specific antibody or an anti-VE-Cadherin antiserum, respectively,  
740 and a Cy5 goat anti-rabbit IgG (red). (A, B) The SARS-CoV-2 was visualized by  
741 detection of the spike protein via a spike-specific antibody and an Alexa Fluor™ 488-  
742 conjugated goat anti-mouse IgG (green). The nuclei were stained with Hoechst 33342  
743 (blue). Scale bars represent 100  $\mu\text{m}$ . (C) Production of antiviral cytokines derived from  
744 the epithelial side was determined by use of Legendplex Panel (Biolegend, CA, USA).  
745 SARS-CoV-2 induced IFN $\beta$ , IFN $\lambda$ 1 and IFN $\lambda$ 2,3 release (pg/ml) was measured. Means  
746  $\pm$  SD of three independent experiments each infected with another patient isolate  
747 (5159, 5587, 5588) are shown. Levels of mock-treated samples were arbitrarily set as 1.  
748 After normalization, two-tailed unpaired t-tests were performed for comparison of  
749 mock-treated and SARS-CoV-2-infected and samples. (\*\*p < 0.01).

750

751 **Figure 5: SARS-CoV-2 infection results in the disruption of barrier integrity in the**  
752 **human-alveolus-on-a chip model.**

753 The epithelial side of the alveolus-on-a-chip model was left uninfected (mock) or  
754 infected with the SARS-CoV-2 patient isolate (5159) (MOI=1) for 28h. An overview  
755 (upper panel) of the (A) epithelial layer and (B) endothelial layer are depicted. Dead  
756 cells (middle panel) are focused. The surface of dead cells (lower panel) shows  
757 particles (arrows) attached to the plasma membranes of the epithelial cells only. Scale  
758 bars represent 50  $\mu\text{m}$  (200 $\times$ magnification), 5  $\mu\text{m}$  (2.000 $\times$ magnification) and 200 nm  
759 (60.000 $\times$ magnification).

760 (C) Barrier function of the human alveolus-on-a-chip model was analyzed by a  
761 permeability assay of mock-infected and SARS-CoV-2-infected human alveolus-on-a-  
762 chip model using FITC-dextran at 28h p.i., FITC-dextran was measured via the  
763 fluorescence intensity (exc. 488nm; em. 518 nm) and depicted as the permeability  
764 coefficient ( $P_{app}$ ), calculated according to  $P_{app} (\text{cm s}^{-1}) = (dQ/dt) (1/AC_0)$ . Results show  
765 significant higher barrier permeability after SARS-CoV-2 infection. (D) Supernatants  
766 of the epithelial- and endothelial side of SARS-CoV-2 infected human alveolus-on-a-  
767 chip models were used to perform LDH-assays indicating cell membrane rupture at  
768 28h and 40h p.i.. (E) Progeny virus titers were analyzed in the supernatants of the  
769 epithelial- and endothelial layer by standard plaque assay.

770 Shown are means ( $\pm$ SD) of (C) three independent experiments each infected with  
771 another patient isolate (5159, 5587, 5588), (D) LDH release, and (E) plaque forming  
772 units (PFU/ml). Statistical significance was analyzed by unpaired, two-tailed t-test (\*p  
773 < 0.05, \*\*p < 0.01).

774

775 **Figure S1: SARS-CoV-2 infects epithelial cells productively.**

776 (A) Vero-76, Calu-3, and HUVECs were infected with a SARS-CoV-2 patient isolate  
777 (5159, 5587, 5588) (MOI=1). RNA-lysates were performed 24h p.i. and copies of viral  
778 RNA (E-gene) were determined by r-biopharm qRT-PCR. Means  $\pm$  SD of three  
779 independent experiments are shown.

780 (B) HUVECs were infected with a SARS-CoV-2 patient isolate (5159) (MOI=1) for 4h,  
781 8h, and 24h. SARS-CoV-2 was visualized by detection of the spike protein via a spike-  
782 specific antibody and an Alexa Fluor™ 488-conjugated goat anti-mouse IgG (green).  
783 The nuclei were stained with Hoechst 33342 (blue). Immunofluorescence (IF)  
784 microscopy was acquired by use of the Axio Observer.Z1 (Zeiss) with a  
785 200 $\times$ magnification.

786

787 **Figure S2: Infection with SARS-CoV-2 results in the disruption of the epithelial-**  
788 **and endothelial barrier.**

789 The epithelial side of the alveolus-on-a-chip model was left uninfected (mock) or  
790 infected with three different SARS-CoV-2 patient isolates (5159, 5587, 5588) (MOI=1).  
791 Immunofluorescence staining was performed 40h p.i., (A) The E-cadherin of the  
792 epithelial layer and the (B) VE-cadherin of the endothelial layer were visualized by an  
793 anti-E-Cadherin-specific antibody or an anti-VE-Cadherin antiserum, respectively,  
794 and a Cy5 goat anti-rabbit IgG (red). (A, B) The SARS-CoV-2 was visualized by  
795 detection of the spike protein via a spike-specific antibody and an Alexa Fluor™ 488-



796 conjugated goat anti-mouse IgG (green). The nuclei were stained with Hoechst 33342  
797 (blue). Scale bars represent 100  $\mu\text{m}$ .

**Figure 1**

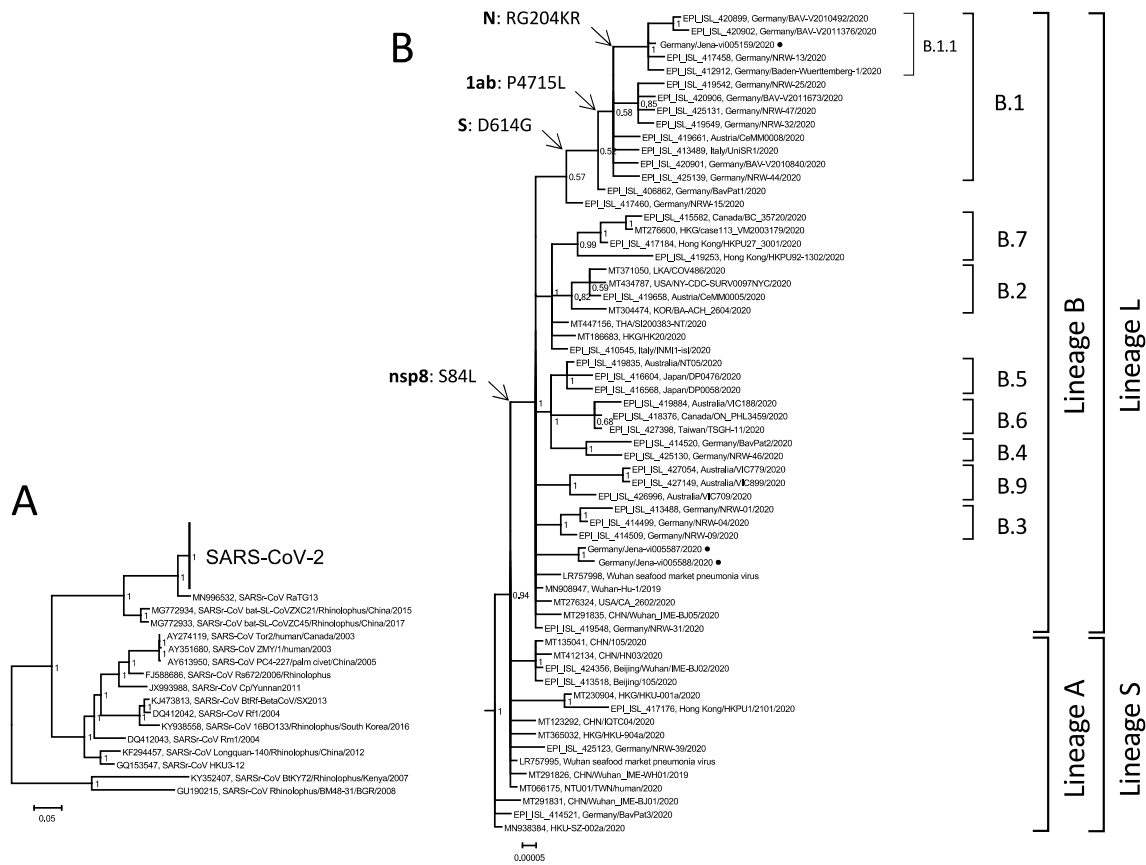

798

799

## Figure 2

**A**

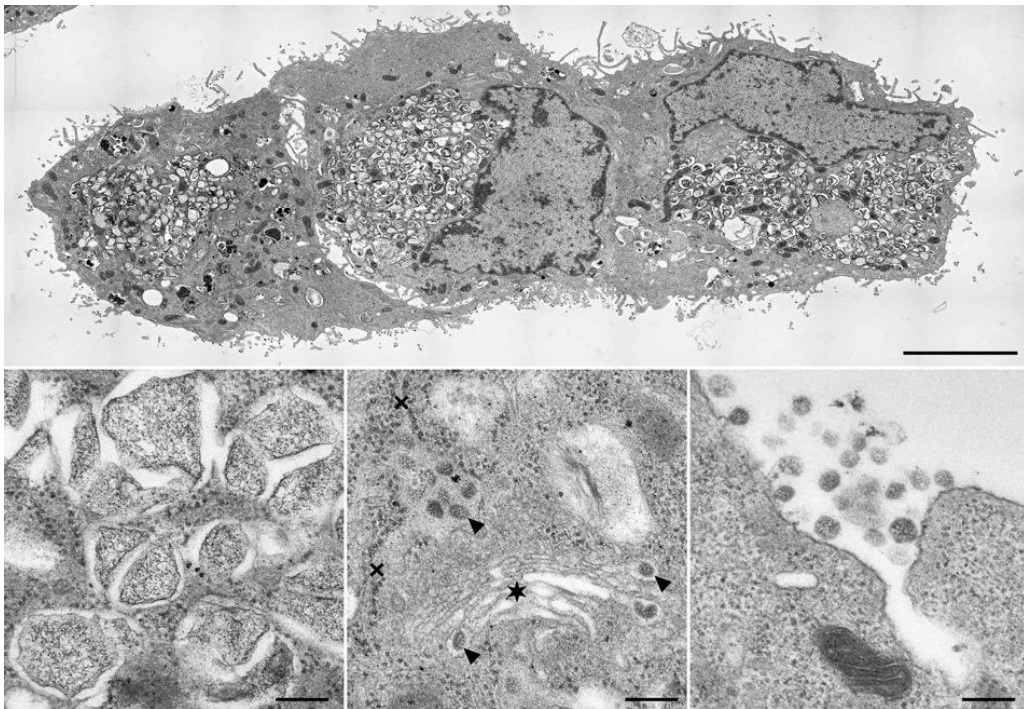

**B**

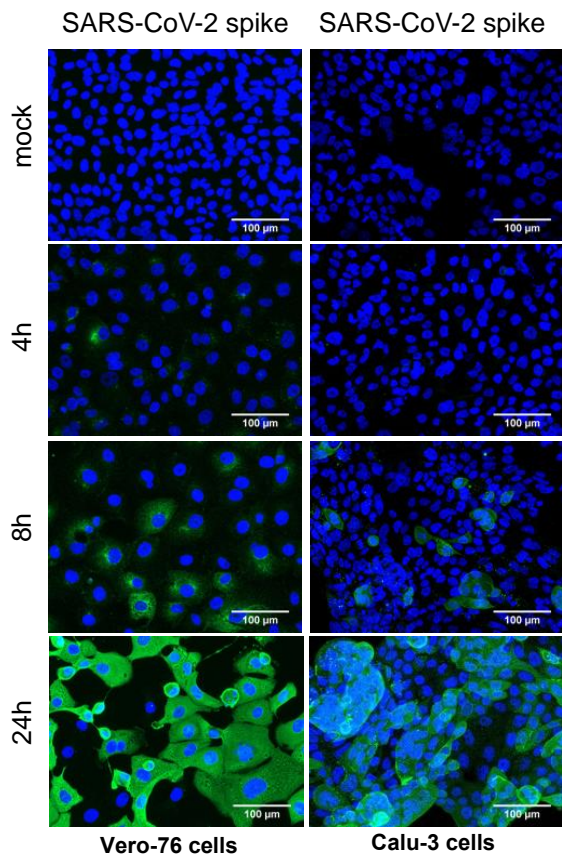

**C**

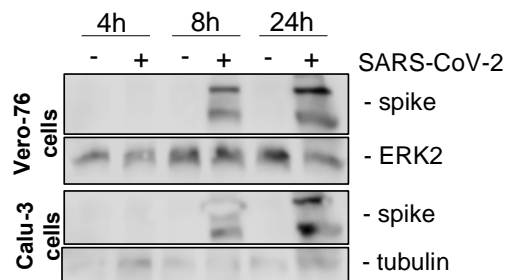

**D**

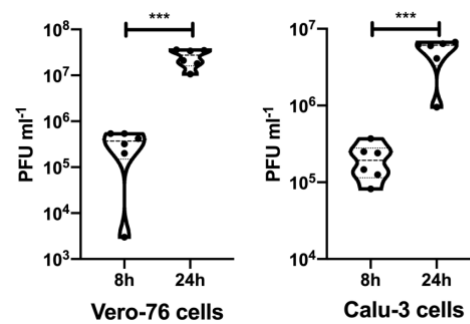

800

801

## Figure 3

A

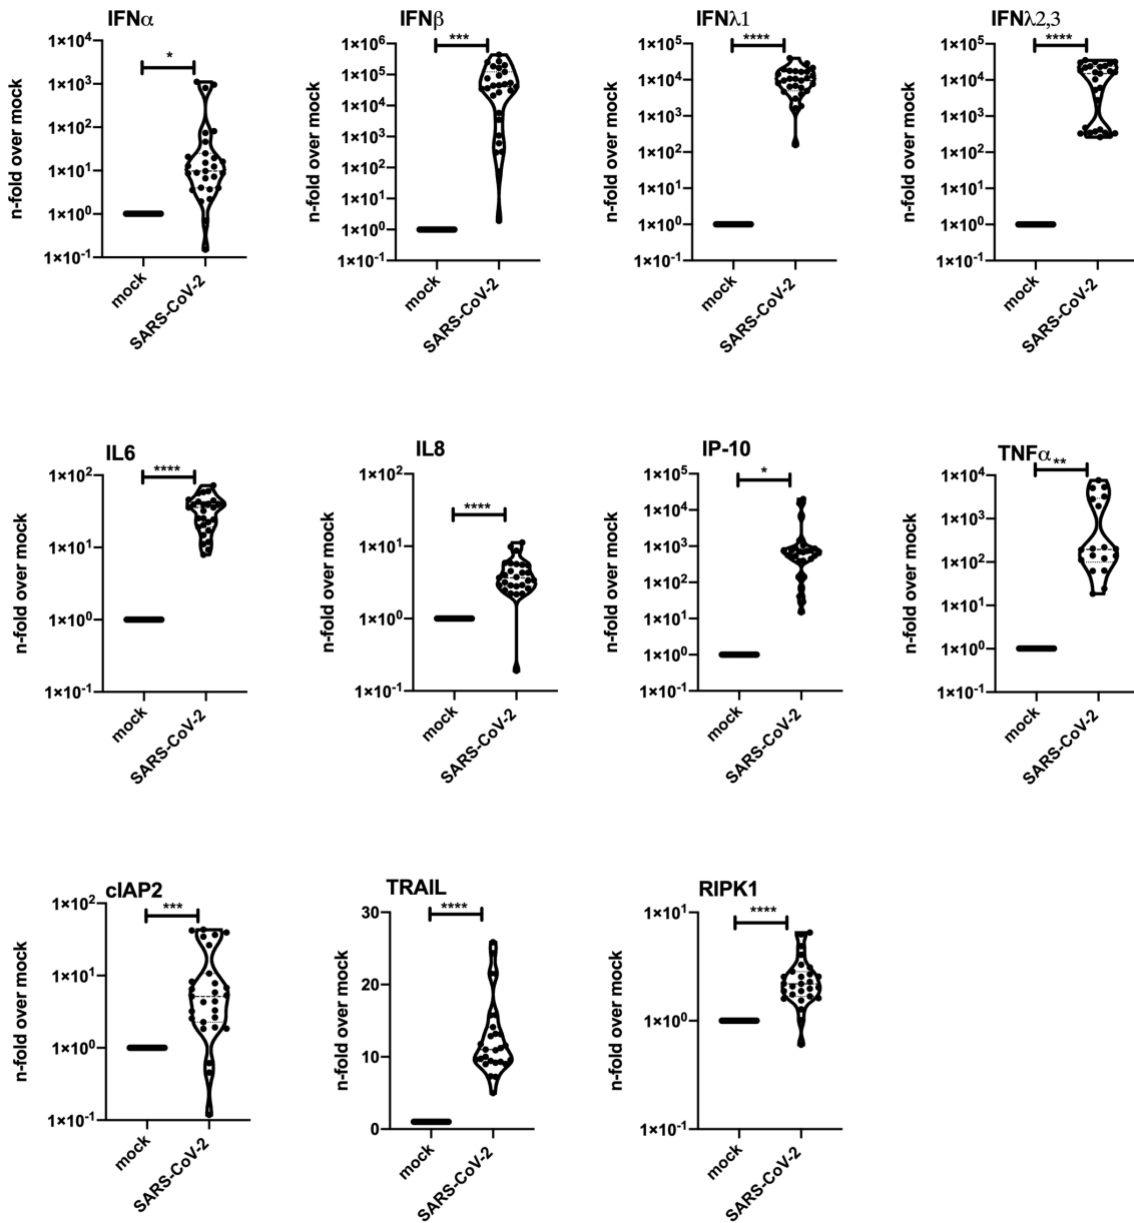

802

803

## Figure 4

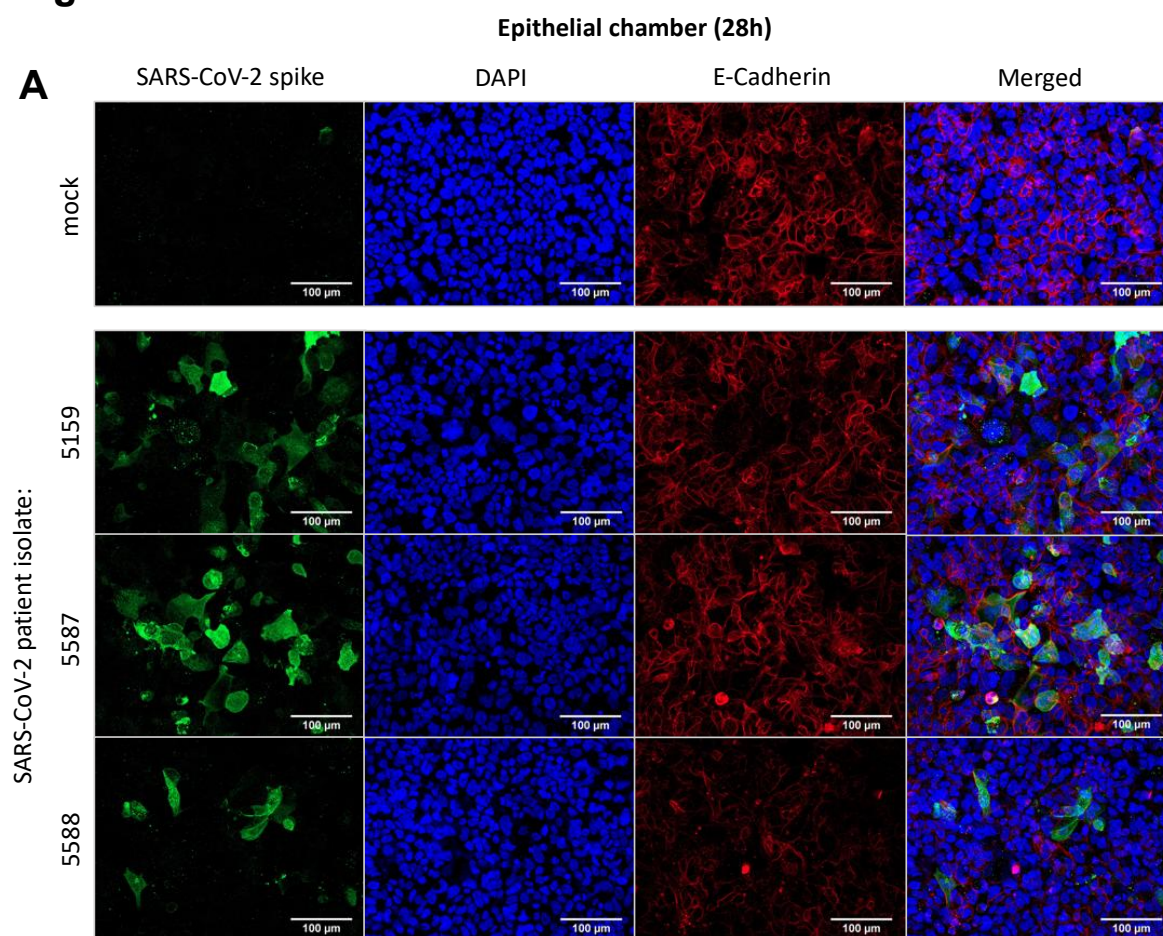

804

805

## Figure 4

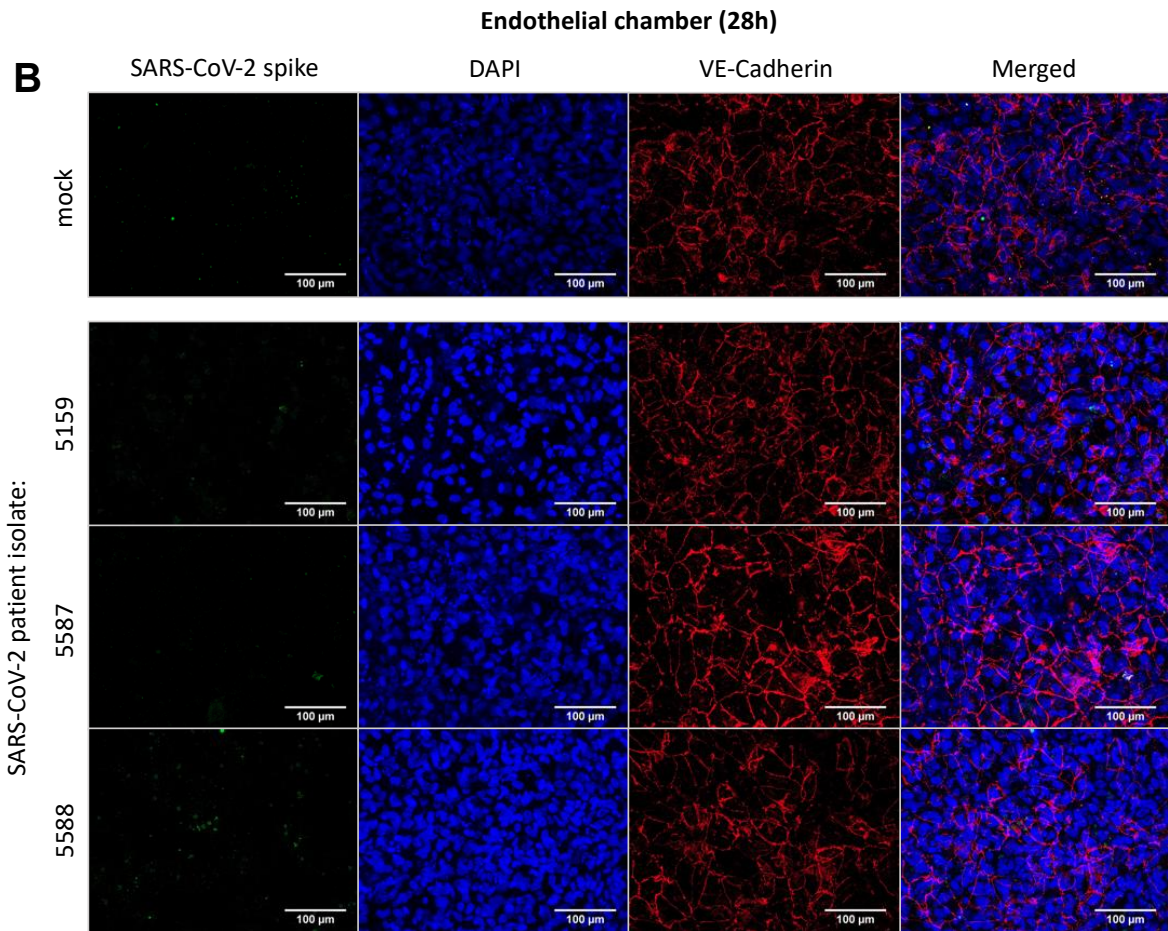

## C

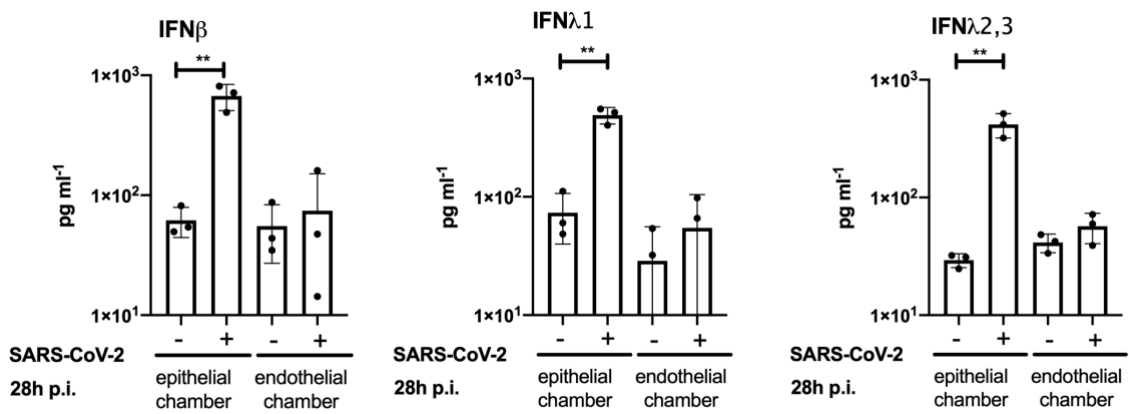

806

807

## Figure 5

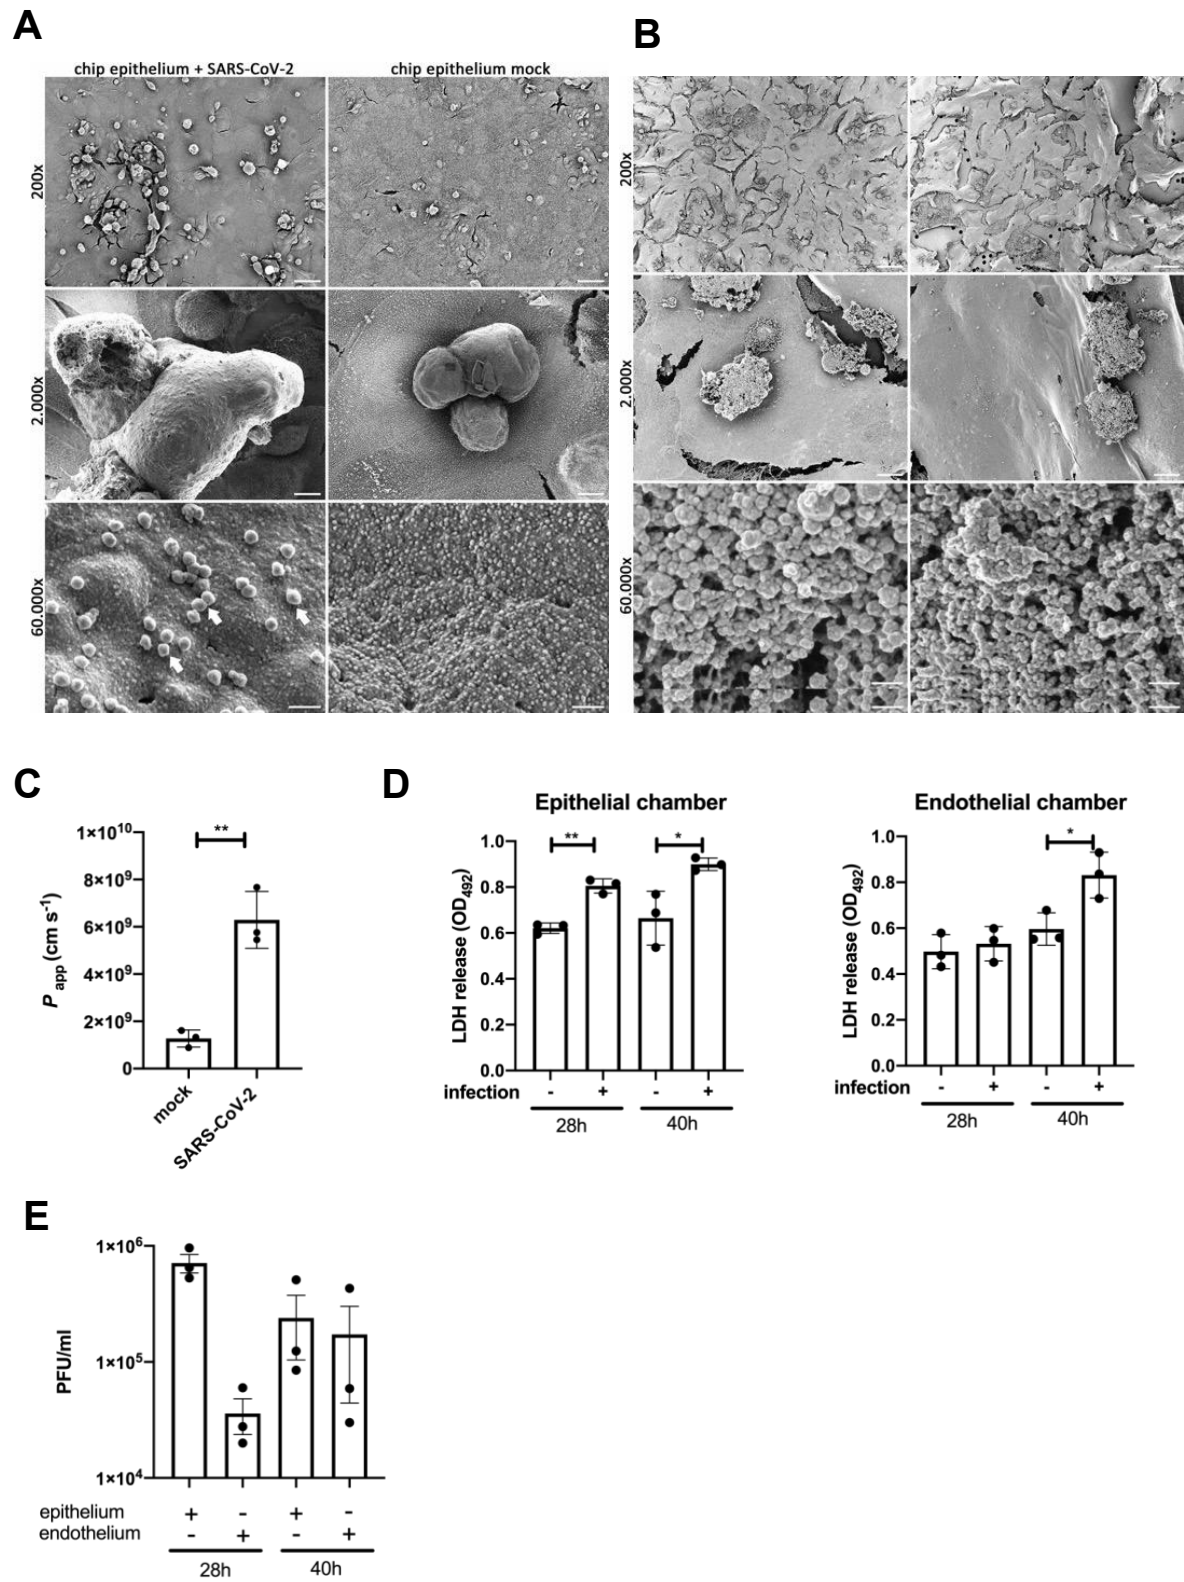

808

809

## Figure S1

A

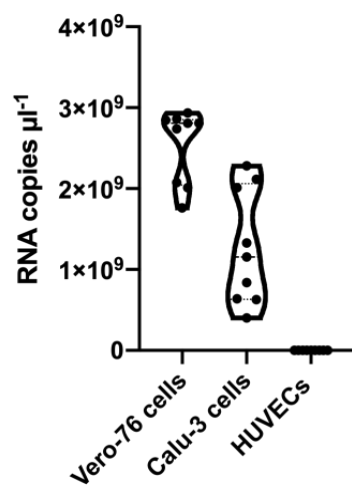

810

811



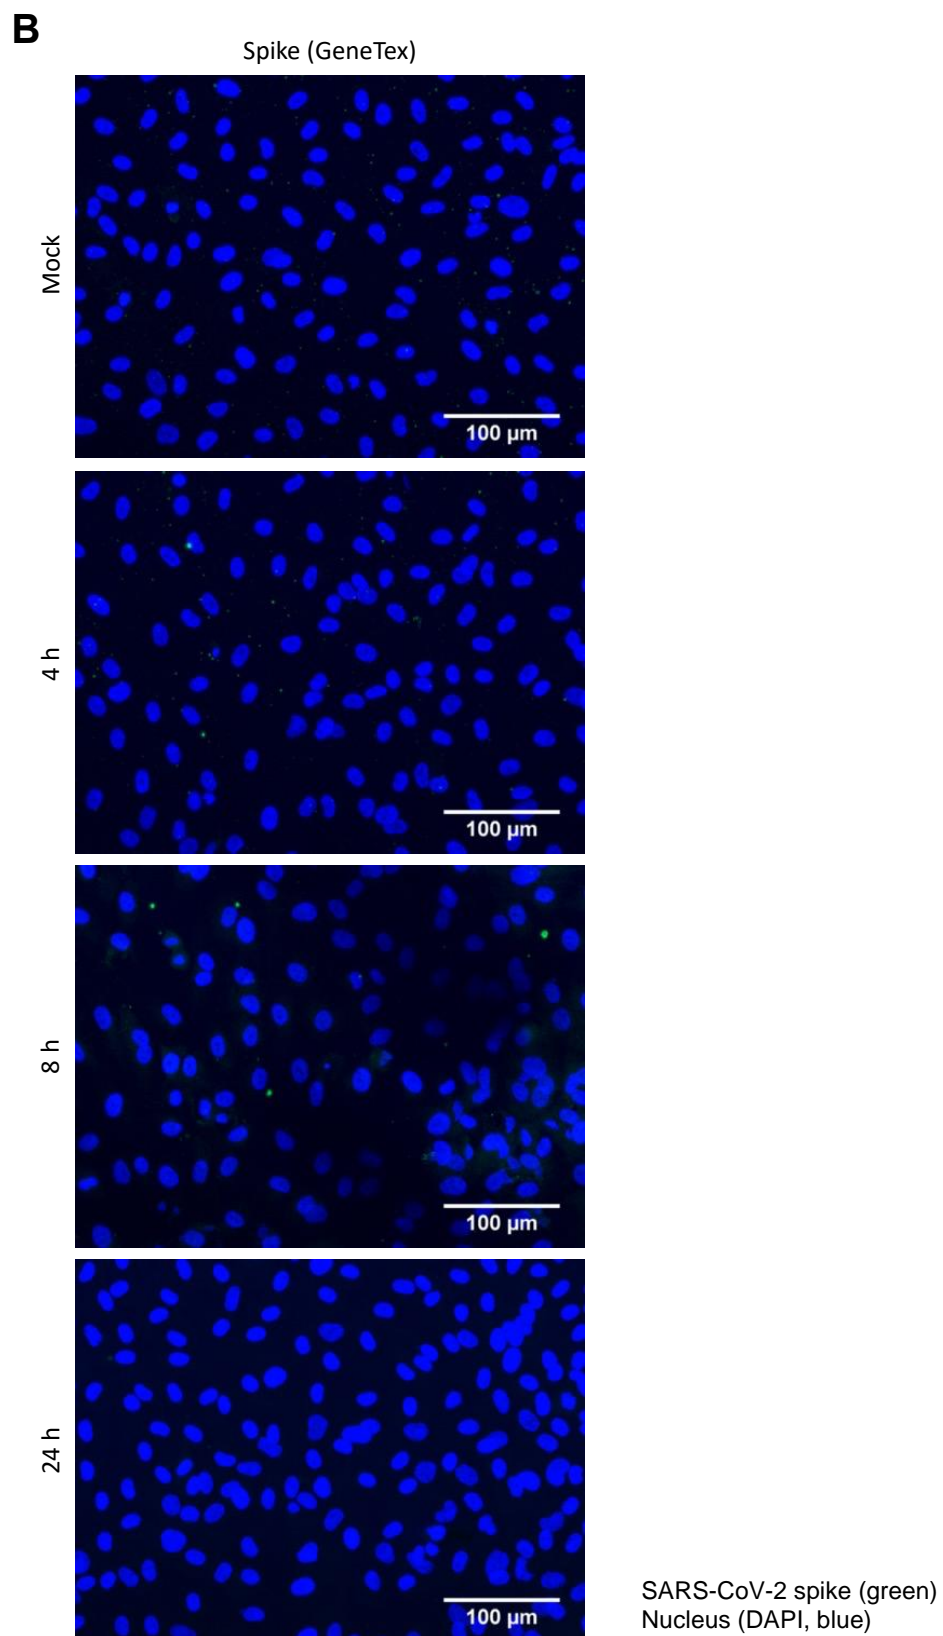

812

813

## Figure S2

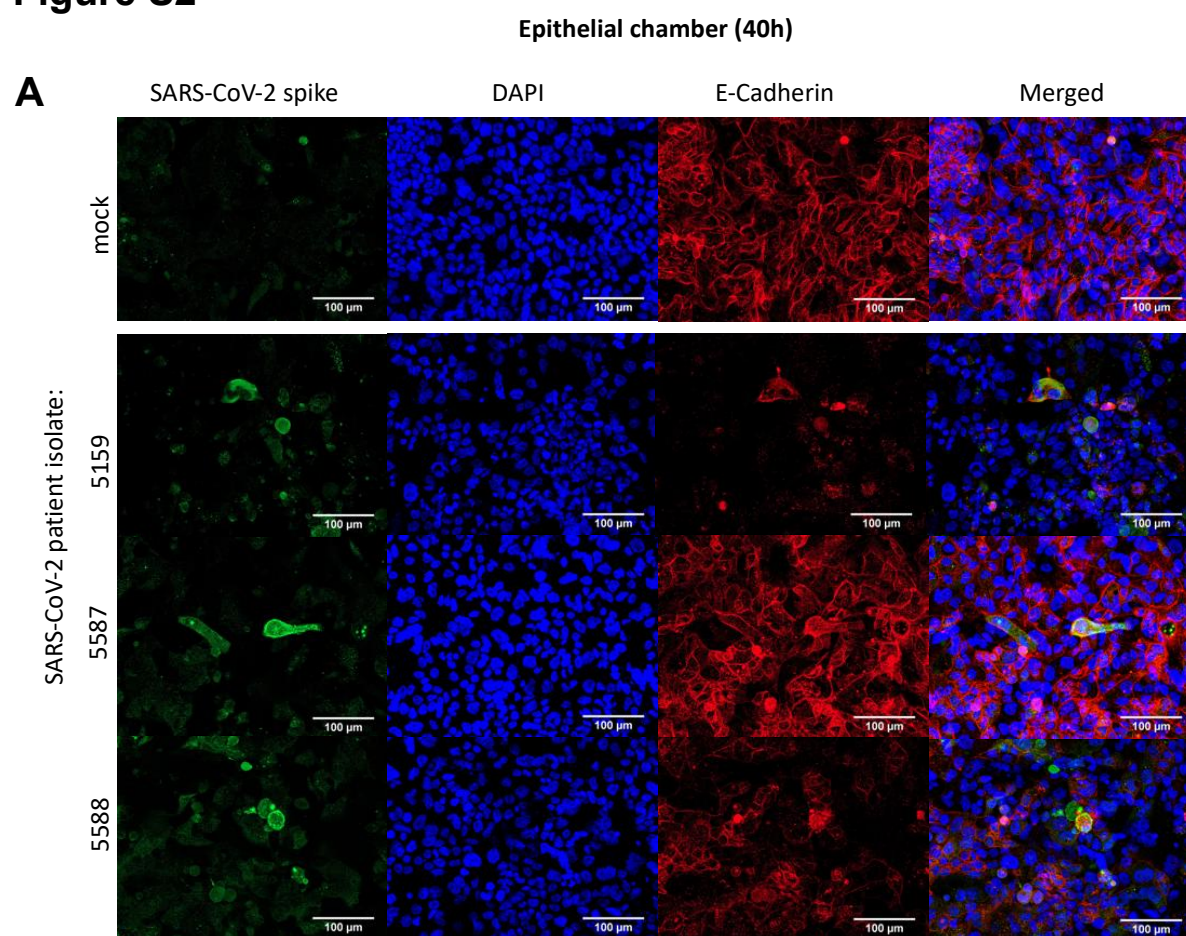

814

815

## Figure S2

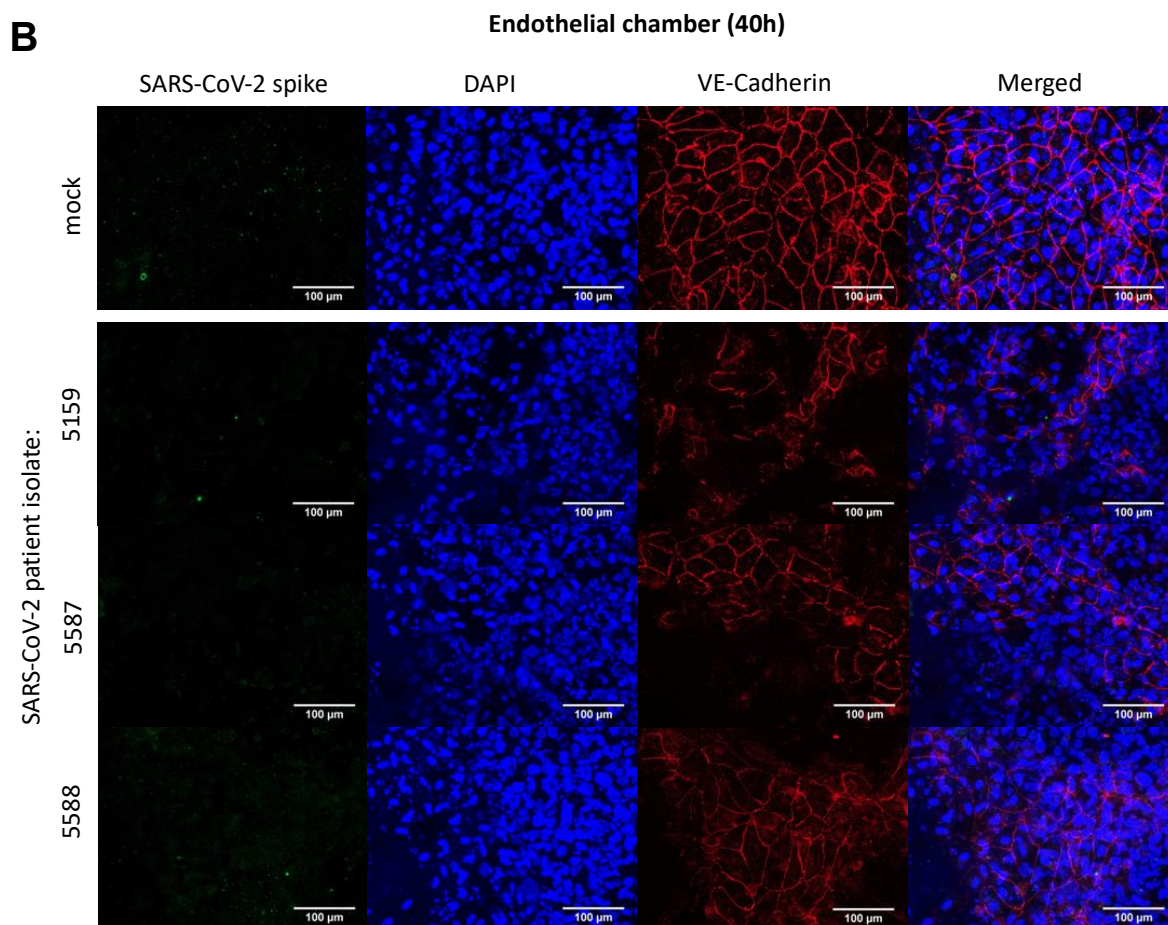

816

817

818 STAR ★ METHODS

819

820 KEY RESOURCES TABLES

821

| REAGENT or RESOURCE                                              | SOURCE                    | IDENTIFIER  |
|------------------------------------------------------------------|---------------------------|-------------|
| <b>Antibodies</b>                                                |                           |             |
| SARS-CoV-2 spike, mouse                                          | GeneTex                   | GTX632604   |
| E-Cadherin, rabbit                                               | Cell Signaling            | 3195S       |
| VE-Cadherin, rabbit                                              | SinoBiological            | 2158S       |
| ERK2, mouse                                                      | Santa Cruz                | sc-1647     |
| SARS-CoV-2/2019-nCoV Spike/S2 Rabbit Antibody                    | Sino Biological           | 40590-T62   |
| Goat anti-Mouse IgG (H+L) Secondary Antibody, HRP                | BIORad                    | 31430       |
| goat-anti-rabbit-igg-h-l-hrp-conjugate AF488, secondary antibody | BIORad                    | 1706515     |
| Cy5, secondary antibody                                          | Dianova                   | 115-545-146 |
| Alpha-Tubulin, Rabbit                                            | Dianova                   | 111-175-144 |
|                                                                  | Cell signaling Technology | 2144S       |
| <b>Cell lines</b>                                                |                           |             |
| Vero-76                                                          | ATCC                      | CRL 1587    |
| Calu-3                                                           | ATCC                      | HTB-55      |
| <b>Chemicals</b>                                                 |                           |             |
| RPMI 1640                                                        | Lonza                     | BE12-115F   |
| EMEM                                                             | Sigma Aldrich             | M7278       |
| M199                                                             | Lonza                     | BE12-117F   |
| Fetal serum                                                      | Sigma Aldrich             | F7524       |
| Human serum                                                      | Sigma Aldrich             | H4522       |
| 10x MEM for plaque assay medium                                  | Gibco                     | 21430       |
| Endothelial growth supplement (ECGS)                             | Sigma                     | 02-102      |
| Hoechst 33342                                                    | Merck                     | 14533       |
| <b>Commercial Kits</b>                                           |                           |             |
| CyQUANT LDH cytotoxicity assay kit                               | Thermo Fisher Scientific  | C20301      |
| RNeasy Mini Kit                                                  | Qiagen                    | 74106       |
| QIAmp viral RNA Mini Kit                                         | Qiagen                    | 52906       |
| RIDA Gene SARS-CoV-2 real-time PCR kit                           | R-Biopharm                | PG6815      |
| Legendplex Human anti-virus response panel kit                   | Biolegend                 | 740349      |
| <b>Oligonucleotides</b>                                          |                           |             |
| human_IP-10_fw<br>5'-CCAGAATCGAAGGCCATCAA-3'                     | metabion                  | N/A         |
| human_IP-10_rev<br>5'-TTTCCTTGCTAACTGCTTTCAG-3'                  | metabion                  | N/A         |
| human_TNF-alpha_fw<br>5'-GGAGAAGGGTGACCGACTCA-3'                 | metabion                  | N/A         |
| human_TNF-alpha_rev<br>5'-CTGCCCAGACTCGGCAA-3'                   | metabion                  | N/A         |
| human_IFNβ_fw<br>5'-TCTGGCACAACAGGTAGTAGGC-3'                    | metabion                  | N/A         |

|                                                            |                                                                                                |     |
|------------------------------------------------------------|------------------------------------------------------------------------------------------------|-----|
| human_IFN $\beta$ _rev<br>5'-<br>GAGAAGCACAACAGGAGAGCAA-3' | metabion                                                                                       | N/A |
| human_GAPDH_fw<br>5'-CTCTGCTCCTCCTGTTTCGAC-3'              | metabion                                                                                       | N/A |
| human_GAPDH_rev<br>5'-CAATACGACCAAATCCGTTGAC-<br>3'        | metabion                                                                                       | N/A |
| C_GAPDH_fwd<br>5'-ACACCCACTCTTCCACCTTC-3'                  | metabion                                                                                       | N/A |
| C_GAPDH_rev<br>5'-CTCTCTCTCCTCTTGCTC-3'                    | metabion                                                                                       | N/A |
| human_IP-10_fw<br>5'-CCAGAATCGAAGGCCATCAA-3'               | metabion                                                                                       | N/A |
| <b>Software</b>                                            |                                                                                                |     |
| Zen, 2.6 (blue edition)                                    | Carl Zeiss AG                                                                                  | N/A |
| MrBayes                                                    | v3.2                                                                                           | N/A |
| <b>Systems for cDNA Synthesis and qRT-PCR</b>              |                                                                                                |     |
| Nano-Drop                                                  | Nano-Drop 1000<br>(PEQLAB<br>Biotechnology<br>GmbH)                                            | N/A |
| Thermo cycler (for cDNA synthesis)                         | Peqstar (PEQLAB<br>Biotechnology<br>GmbH)                                                      | N/A |
| Realtime PCR cycler                                        | Rotor Gene Q<br>(QIAGEN)                                                                       | N/A |
| Acquisition software for RNA concentration                 | NanoDrop 1000<br>V3.8.1<br>(ThermoFisher<br>Scientific)                                        | N/A |
| Acquisition software for qRT-PCR                           | Q-Rex V1.1.0.4<br>(QIAGEN)                                                                     | N/A |
| Software used for subsequent data analysis                 | Microsoft Office 2010 (Microsoft)<br>GraphPad Prism V8.3.0.538<br>(Graphpad<br>Software, Inc.) | N/A |
| <b>Systems for microscopy</b>                              |                                                                                                |     |
| Model                                                      | Carl Zeiss<br>Observer.Z1                                                                      | N/A |
| Type of objective lenses                                   | Plan-Apochromat                                                                                | N/A |
| Magnification of objective lenses                          | 20x                                                                                            | N/A |
| Numerical aperture of objective lenses                     | 0.8                                                                                            | N/A |
| Imaging medium                                             | Dako<br>Fluorescence<br>Mounting<br>Medium                                                     | N/A |

|                                                                       |                                                         |                                                                                                                                                                                                                           |
|-----------------------------------------------------------------------|---------------------------------------------------------|---------------------------------------------------------------------------------------------------------------------------------------------------------------------------------------------------------------------------|
| camera                                                                | Zeiss Axioxaam 503 mono                                 | N/A                                                                                                                                                                                                                       |
| ApoTome                                                               | ApoTome.2 Carl Zeiss                                    | N/A                                                                                                                                                                                                                       |
| Aquisition software                                                   | Zeiss Zen 2.6 (blue edition)                            | N/A                                                                                                                                                                                                                       |
| Operations involved (deconvolution, Fourier-Filter, gamma)            | Deconvolution, gamma correction, phase error correction | N/A                                                                                                                                                                                                                       |
| File formats                                                          | 16-bit                                                  | N/A                                                                                                                                                                                                                       |
| <b>Sample Preparation, Sequencing and Analysis</b>                    |                                                         |                                                                                                                                                                                                                           |
| MinION - Sequencer                                                    | Oxford Nanopore Technologies                            | N/A                                                                                                                                                                                                                       |
| Ligation Sequencing Kit (SQK-LSK109)                                  | Oxford Nanopore Technologies                            | N/A                                                                                                                                                                                                                       |
| R9.4.1 flow cells Nanopore FLO-MIN106                                 | Oxford Nanopore Technologies                            | N/A                                                                                                                                                                                                                       |
| Native Barcoding Expansion (EXP-NBD104)                               | Oxford Nanopore Technologies                            | N/A                                                                                                                                                                                                                       |
| Workflow: poreCov via nextflow using docker                           | For genome reconstruction (version 0.2)                 | <a href="https://github.com/replikation/poreCov">https://github.com/replikation/poreCov</a>                                                                                                                               |
| Primer Scheme V3 was used for amplicon-based sequencing of SARS-CoV-2 | V3                                                      | <a href="https://github.com/artic-network/artic-ncov2019/blob/master/primer_schemes/nCoV-2019/V3/nCoV-2019.tsv">https://github.com/artic-network/artic-ncov2019/blob/master/primer_schemes/nCoV-2019/V3/nCoV-2019.tsv</a> |
| NEBNext Ultra II End-prep                                             | NEB                                                     | M0493S                                                                                                                                                                                                                    |
| NEBNext Quick Ligation Module                                         | NEB                                                     | E6056S                                                                                                                                                                                                                    |
| Q5 Hot Start HF Polymerase                                            | NEB                                                     | M0493S                                                                                                                                                                                                                    |
| RNase OUT (125 rxn)                                                   | Thermofischer                                           | 10777019                                                                                                                                                                                                                  |
| Random Hexamers (50 µM)                                               | Thermofischer                                           | N8080127                                                                                                                                                                                                                  |
| Zymo Quick-RNA Viral Kit                                              | Zymo                                                    | R1034                                                                                                                                                                                                                     |
| SuperScript IV (50 rxn)                                               | Thermofischer                                           | 18090050                                                                                                                                                                                                                  |
| dNTP mix (10 mM each)                                                 | Thermofischer                                           | R0192                                                                                                                                                                                                                     |

822

823

824
